# Supplementary material
Source: PubMed Central journal article supplement (PMC5413443)
Supplement: NIHMS853119-supplement-2.pdf [file NIHMS853119-supplement-2.pdf]

## Supplementary Figure S1

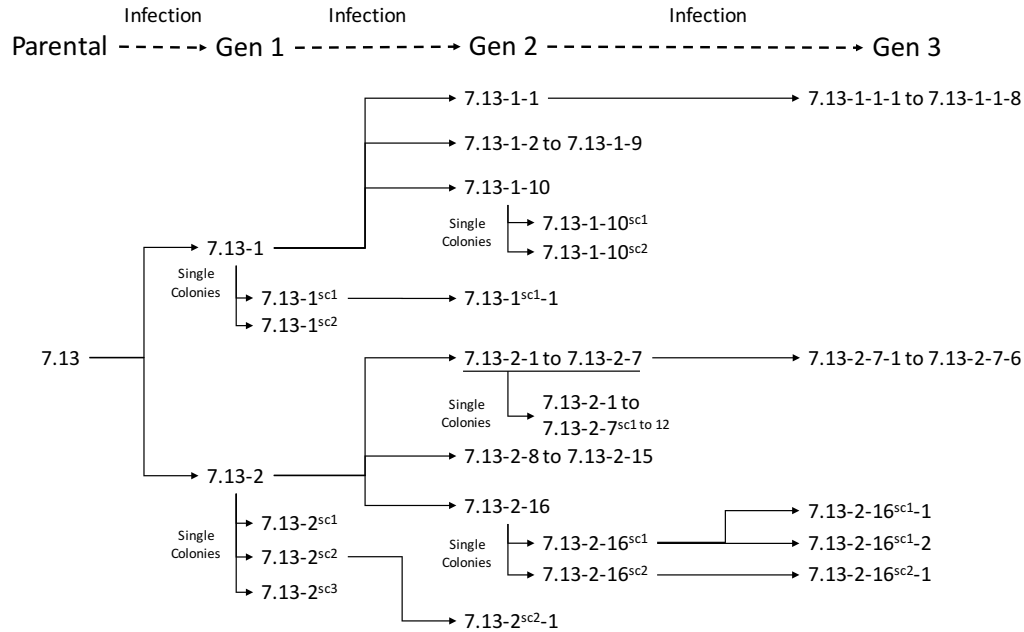

Overall experimental flow diagram of sequential *in vivo* infections showing the original parental 7.13 strain, the 7.13 derivative *H. pylori* strains by generation and passages (Gen) in Mongolian gerbils.

## Supplementary Figure S2

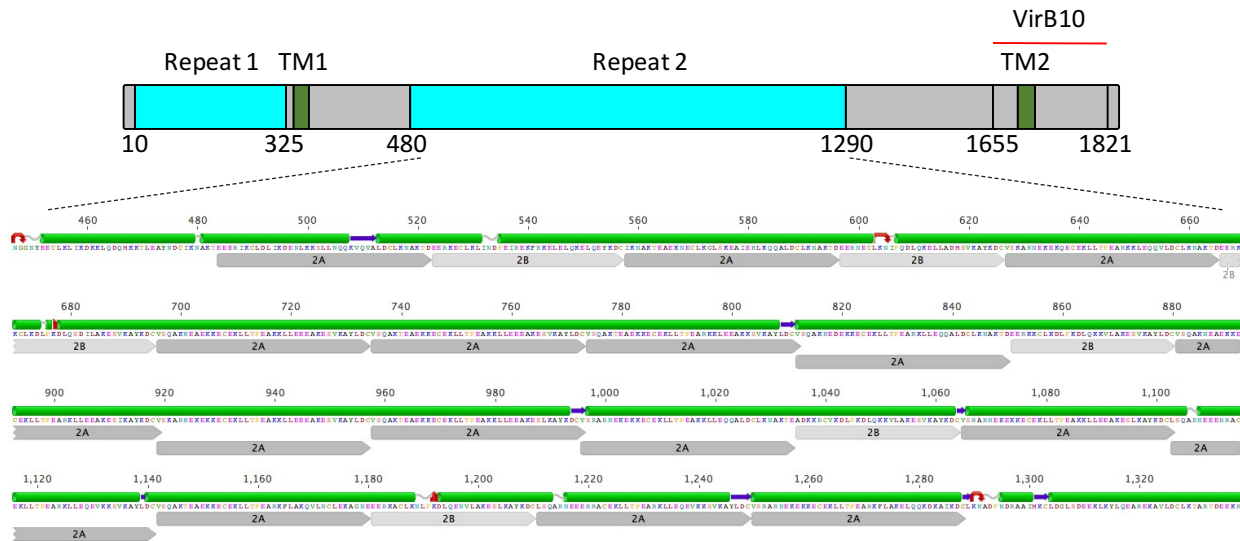

Conserved domain model of *cagY* from *H. pylori* strain 7.13 highlighting the repeat domains, transmembrane domains (TM1 and TM2) and identity with VirB10 (orange line). Bottom; details of repeat domain 2 showing the predicted secondary structure (green: alpha helix; purple: beta-sheets, and red: beta turns) and repeat motifs 2A and 2B (gray). Predicted secondary structures were calculated using the Garnier tool from EMBOSS.

## Supplementary Figure S3

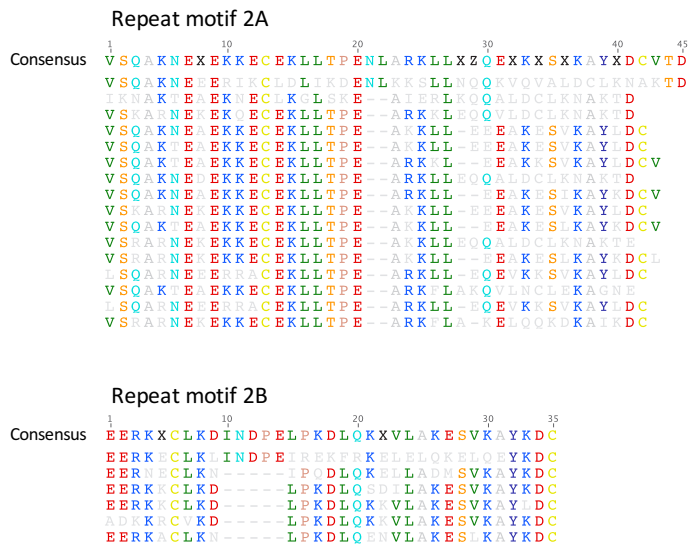

Consensus amino acid sequences of motif 2A and motif 2B from the CagY repeat domain 2 of *H. pylori* strain 7.13. Each individual motif sequence (Motif 2A, n=16; Motif 2B, n=6) was compared, and a consensus motif sequence was determined for Motif 2A and 2B. Alignment of motifs were done using Geneious software version 6.0.6.

## Supplementary Figure S4

J99

24 SNPs

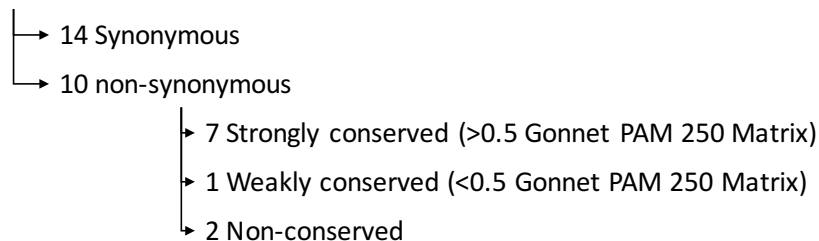

All non-synonymous SNPs are located in the CagY repeat domain 2 and predict changes in secondary protein structure

Flow diagram of single nucleotide polymorphisms found in *cagY* sequences of the *H. pylori* archival and recent J99 strains.

## Supplementary Figure S5

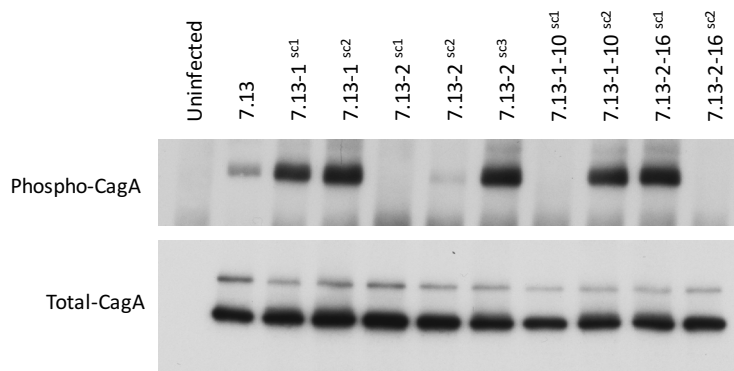

Western blot analysis for phosphorylated and total CagA using AGS cells co-cultured with *H. pylori* single colony strains carrying different rearrangements in *cagY*

Supplementary Figure S6

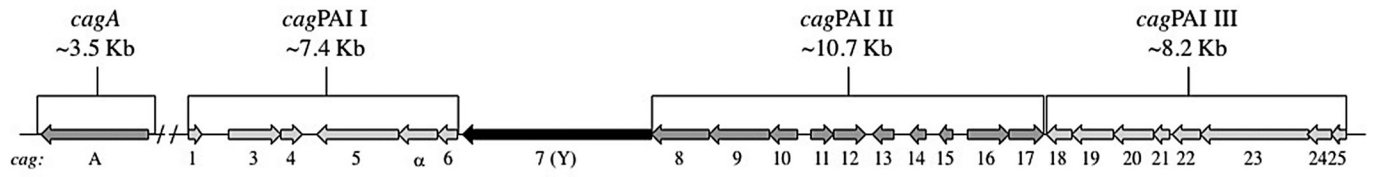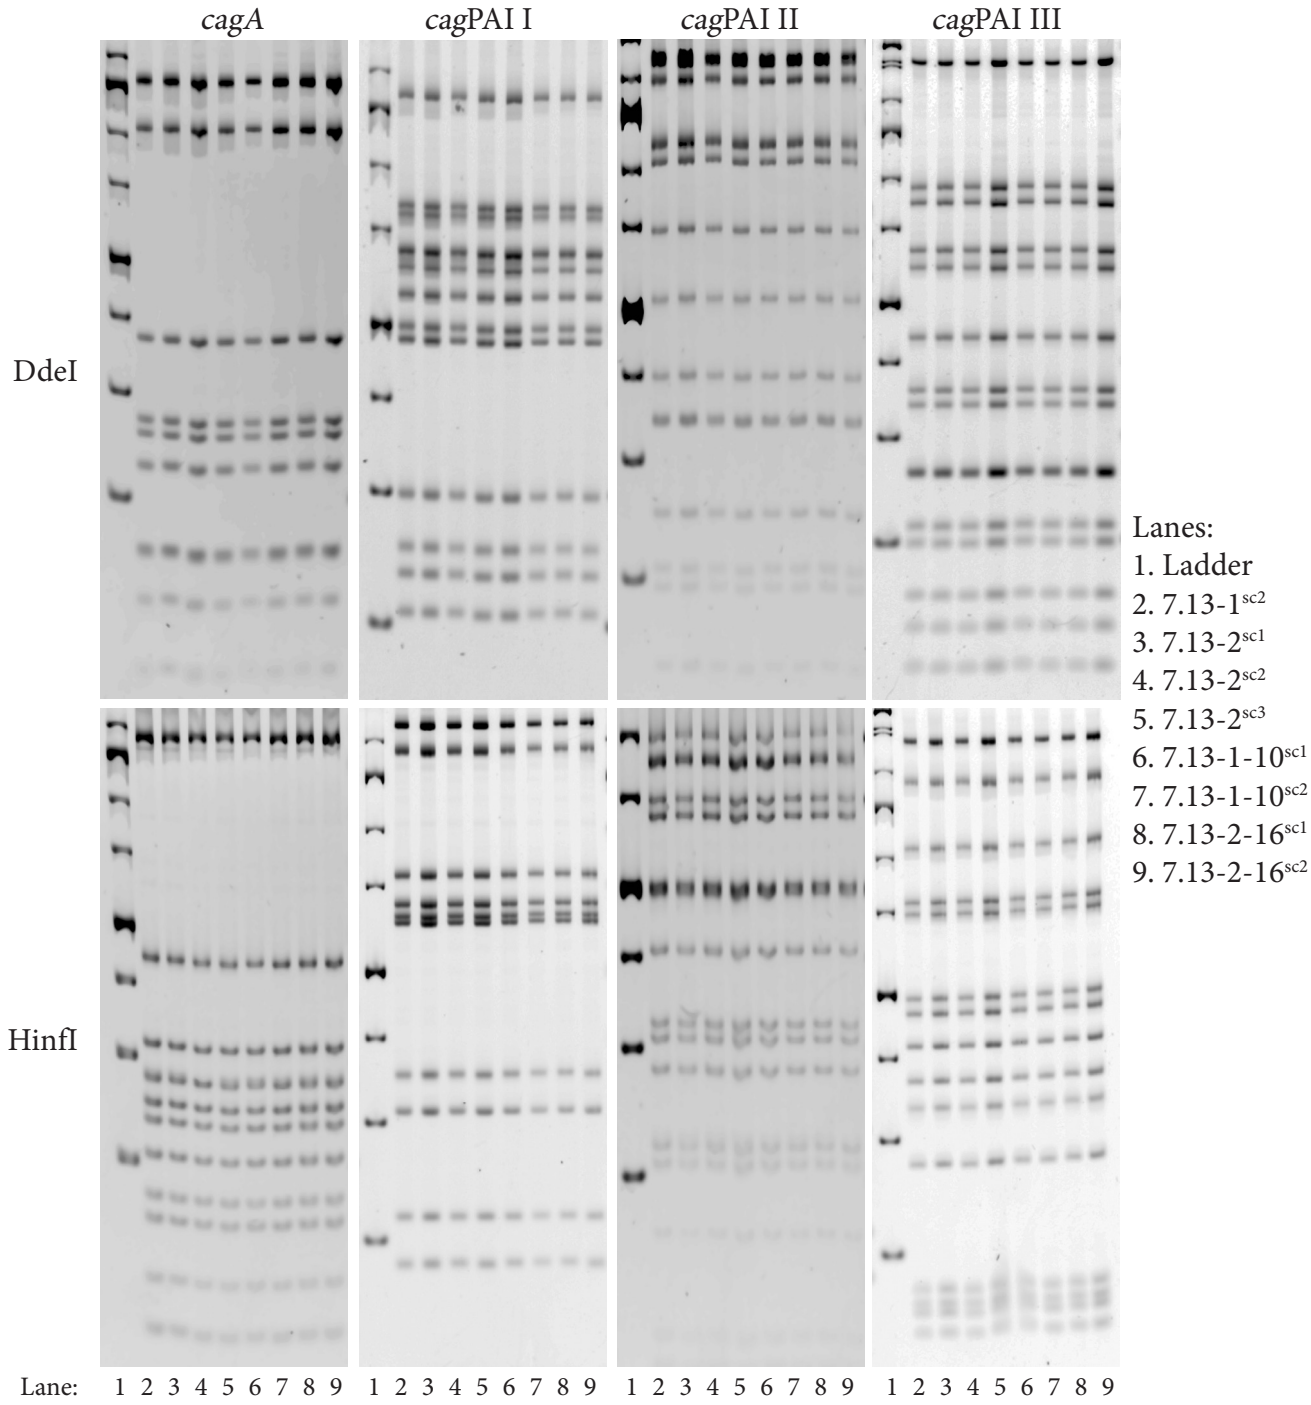

RFLP of PCR amplicons generated from *cagA* and the *cagPAI*, which was segregated into three separate components excluding *cagY*, from eight different single colony isolates of *H. pylori* that contain different *cagY* rearrangements. Top: schematic representation of the *cagPAI* and the different PCR amplicons. Bottom: RFLP gels of PCR amplicons digested with DdeI and HinfI



1701 TATCTTTTGGCTGTAGCTTGAGCTTTGCTTCCATTCTATTTTGTGTGCTTCTGTTCTCCAATTTTTCCTACTTCTTTCTCTAAATGCTCTCG 1800  
|||||  
1701 TATCTTTTGGCTGTAGCTTGAGCTTTGCTTCCATTCTATTTTGTGTGCTTCTGTTCTCCAATTTTTCCTACTTCTTTCTCTAAATGCTCTCG 1800  
1801 TTTCCCTTAGAGATTTTCAAGATTTTCTGAGCTTTTTCCTACTTCGTACATAATGCCTGTGTTTTAGCTTCAGCTACAGCTTTATTGAGGTTTAAACT 1900  
|||||  
1801 TTTCCCTTAGAGATTTTCAAGATTTTCTGAGCTTTTTCCTACTTCGTACATAATGCCTGTGTTTTAGCTTCAGCTACAGCTTTATTGAGGTTTAAACT 1900  
1901 TTTCCAACCAATTCCTTGTGTGCTGTTCAAAAAGTCTTTGATGAGCTTATTAGCTTCTTGTGGGGACAATCCTTTAGCCCCAGTTTCTCTCTAAGTCTC 2000  
|||||  
1901 TTTCCAACCAATTCCTTGTGTGCTGTTCAAAAAGTCTTTGATGAGCTTATTAGCTTCTTGTGGGGACAATCCTTTAGCCCCAGTTTCTCTCTAAGTCTC 2000  
2001 GCCTTATATACTAGTAGTAGCGAGATTATTTAAATTAGGCAAATTAAGACAGCTACCTTGCTAAGATTTGCTTCCAATGGGAAACGCCATTTCGTAGC 2100  
|||||  
2001 GCCTTATATACTAGTAGTAGCGAGATTATTTAAATTAGGCAAATTAAGACAGCTACCTTGCTAAGATTTGCTTCCAATGGGAAACGCCATTTCGTAGC 2100  
2101 ACCCACACCTTATCAGGACTCTTGAGGCGTTGGTGTATTGAAATTAGAATAATCAACAACATCAGCCATCATGTTTTAGGCTACCTTGAAGAGTG 2200  
|||||  
2101 ACCCACACCTTATCAGGACTCTTGAGGCGTTGGTGTATTGAAATTAGAATAATCAACAACATCAGCCATCATGTTTTAGGCTACCTTGAAGAGTG 2200  
2201 GTTTTTATCTCCCTATCTAAAGCTTTATCTGCTTTTTTCCATAATCTTTGAGAGTGTAGCTCAAGTCCCCTACTACCAAACCTCAGTAACTAAAGCTAAAT 2300  
|||||  
2201 GTTTTTATCTCCCTATCTAAAGCTTTATCTGCTTTTTTCCATAATCTTTGAGAGTGTAGCTCAAGTCCCCTACTACCAAACCTCAGTAACTAAAGCTAAAT 2300  
2301 GTTTTTGTCTTTTTTAGAAACAAAAGCAATGTGATCATTCCCTAGGCGCTCAAATAAGCCTTATGGTCTTTTTGAAAATCTTCAATCTCATTTTGAA 2400  
|||||  
2301 GTTTTTGTCTTTTTTAGAAACAAAAGCAATGTGATCATTCCCTAGGCGCTCAAATAAGCCTTATGGTCTTTTTGAAAATCTTCAATCTCATTTTGAA 2400  
2401 TTTTTCTTCTCTTCTTCTGCTCAAGTTGCTAATTTAGCATTATTTTGTGCAAGAAATCCATGAAATCTACTTTGTTTTGGATCTCTTTTGTAGCTCAAT 2500  
|||||  
2401 TTTTTCTTCTCTTCTTCTGCTCAAGTTGCTAATTTAGCATTATTTTGTGCAAGAAATCCATGAAATCTACTTTGTTTTGGATCTCTTTTGTAGCTCAAT 2500  
2501 GCTTGTTCAGCCTGTGAGCTGATCTTCTTTGTAGAGATAAAAAGTGGTGTAAACCCCTTCTCACCACCTGCTATGACTAACCCACTGCCGTTTT 2600  
2501 GCTTGTTCAGCCTGTGAGCTGATCTTCTTTGTAGAGATAAAAAGTGGTGTAAACCCCTTCTCACCACCTGCTATGACTAACCCACTGCCGTTTT 2600  
2601 TCATATGCACATTAATGAGTGTAGCCACATTTGCTTGTGGTTTTATGACCAACGGTGGCGTTCCAATCATGCCTAGCTTCAGGGCCACCATTGTT 2700  
|||||  
2601 TCATATGCACATTAATGAGTGTAGCCACATTTGCTTGTGGTTTTATGACCAACGGTGGCGTTCCAATCATGCCTAGCTTCAGGGCCACCATTGTT 2700  
2701 TCCATACAATAATGAAACTTTTTAGGTTCTATGCCATCATGACTCCCCATTAACACAGAAGACAGAGCGTTATTGTGAACCAATAATGGTTGAACTTG 2800  
|||||  
2701 TCCATACAATAATGAAACTTTTTAGGTTCTATGCCATCATGACTCCCCATTAACACAGAAGACAGAGCGTTATTGTGAACCAATAATGGTTGAACTTG 2800  
2801 TAATTGGGATCAATGTCAGGACTCCCTCAACATCTAACATTTCCATATCGCCAAGAGTGAATTTAGAAAAATTACCCCTTTCATCAAGTAAATCTCTAG 2900  
2801 TAATTGGGATCAATGTCAGGACTCCCTCAACATCTAACATTTCCATATCGCCAAGAGTGAATTTAGAAAAATTACCCCTTTCATCAAGTAAATCTCTAG 2900  
2901 ATTCAGGCGGTAAGCTTTGTATGTCAGTGGTGGTAGTGGCTACATCTGGTTGGACATGAGGAACCTGGTCTTGATTGAGCGTTTCTTTGAGATCGGAAGA 3000  
|||||  
2901 ATTCAGGCGGTAAGCTTTGTATGTCAGTGGTGGTAGTGGCTACATCTGGTTGGACATGAGGAACCTGGTCTTGATTGAGCGTTTCTTTGAGATCGGAAGA 3000  
3001 TTGTTTTTGTAAACACAAATGATAAAAAAATATCAAACCAATCCCCACCAGTAGGATCTCCATTAGGCTCTCCATTTTTTCTGCTTCTTGCCTCTCT 3100  
|||||  
3001 TTGTTTTTGTAAACACAAATGATAAAAAAATATCAAACCAATCCCCACCAGTAGGATCTCCATTAGGCTCTCCATTTTTTCTGCTTCTTGCCTCTCT 3100  
3101 TTCAAAGATTTCATCAAAACAGCCCATGAATTTTGTATCCGATCGGATTTGGTTTCTTATGATAAATCCTGCAAGAGCTTGTGTTGGCAGACCTCAAAAACT 3200  
|||||  
3101 TTCAAAGATTTCATCAAAACAGCCCATGAATTTTGTATCCGATCGGATTTGGTTTCTTATGATAAATCCTGCAAGAGCTTGTGTTGGCAGACCTCAAAAACT 3200  
3201 CCGCTTCTCTTTATCATCAGAGATAGGGGGTTGTATGATATTTCCATAAAACCTCGGATTTTTGGGTGTTGATTTGAGATGGATCTTTTGTAGGGA 3300  
|||||  
3201 CCGCTTCTCTTTATCATCAGAGATAGGGGGTTGTATGATATTTCCATAAAACCTCGGATTTTTGGGTGTTGATTTGAGATGGATCTTTTGTAGGGA 3300  
3301 CACCCAATTCATAAAAAATTGGTAACGCTGAGTCCCAAATTTCTGAAAGCTTTTTATGGAAGAACCTGTATCAATGAGACCGTCTTTGTTGATTAAATCA 3400  
|||||  
3301 CACCCAATTCATAAAAAATTGGTAACGCTGAGTCCCAAATTTCTGAAAGCTTTTTATGGAAGAACCTGTATCAATGAGACCGTCTTTGTTGATTAAATCA 3400  
3401 CTGCTCTTACTGATAAAGTTTGAATAACTGATTCTTTTTGGTAGGATTTTGTATCGCTTTATTAGCGAATTTCTCCCTTAGCTGCGAGATTTTCTCAA 3500  
|||||  
3401 CTGCTCTTACTGATAAAGTTTGAATAACTGATTCTTTTTGGTAGGATTTTGTATCGCTTTATTAGCGAATTTCTCCCTTAGCTGCGAGATTTTCTCAA 3500  
3501 AAGCTTGCTGTTATCCCTATCATTCTTATCAACGATTGGTTTTTGTATCAGGATCAAATGAAGCGACAGCGTTATCAACTTTAATAAAGCCACTTGAAG 3600  
|||||  
3501 AAGCTTGCTGTTATCCCTATCATTCTTATCAACGATTGGTTTTTGTATCAGGATCAAATGAAGCGACAGCGTTATCAACTTTAATAAAGCCACTTGAAG 3600  
3601 ATTATTGATAAATTGCTGCGGGTTAAAAGCCGCTTCGGTTTTGTGGTTGTGGTTAATGGTTTCGTTAGTCATTGTTTCTCCTTACTAT 3688  
|||||  
3601 ATTATTGATAAATTGCTGCGGGTTAAAAGCCGCTTCGGTTTTGTGGTTGTGGTTAATGGTTTCGTTAGTCATTGTTTCTCCTTACTAT 3688



1701 CGGCAATTGATGAGAATAAGCTTTTTGAACAACAAAAGAAAATGTATTTCAATTACGCTAACGATGTGATCTGCAGACCCGATGATGAAGTGTGTTCCGC 1800  
|||||  
1701 CGGCAATTGATGAGAATAAGCTTTTTGAACAACAAAAGAAAATGTATTTCAATTACGCTAACGATGTGATCTGCAGACCCGATGATGAAGTGTGTTCCGC 1800  
1801 CCTAAGAGATGAGATGGTAGCTATGCCACTAGCGATAGCGTTACTCAAAGCCCAATATCATTGCTCCTTATAGCTTGTATAGACTCAAAGAGACAAAT 1900  
|||||  
1801 CCTAAGAGATGAGATGGTAGCTATGCCACTAGCGATAGCGTTACTCAAAGCCCAATATCATTGCTCCTTATAGCTTGTATAGACTCAAAGAGACAAAT 1900  
1901 AACGCCAATGAGACCCAACCATCACCTTATGCCACCCAACCGCTCCTGAAAGCAGCAAAGAGAAGCTTATAGAAGAGCTAATCGCTAACTCCCAACTCA 2000  
|||||  
1901 AACGCCAATGAGACCCAACCATCACCTTATGCCACCCAACCGCTCCTGAAAGCAGCAAAGAGAAGCTTATAGAAGAGCTAATCGCTAACTCCCAACTCA 2000  
2001 TAGCCAATGAGGAAGAGAGGGGAAAAGAACTCTTAGCAGAAAAAGAAAAACAAGAGGCTGAATTGGCTAAATACAAGCTCAAAGACTTAGAAAAATCAAAA 2100  
|||||  
2001 TAGCCAATGAGGAAGAGAGGGGAAAAGAACTCTTAGCAGAAAAAGAAAAACAAGAGGCTGAATTGGCTAAATACAAGCTCAAAGACTTAGAAAAATCAAAA 2100  
2101 GAAACTAAAAGCTTTAGAAGCAGAGTTGAAAAAGAAAACGCTAAGAAACCTAGAGTAGTGGAAAGTGCCTATTTCTCCTCAAACAAGTAATTCTGATGAA 2200  
|||||  
2101 GAAACTAAAAGCTTTAGAAGCAGAGTTGAAAAAGAAAACGCTAAGAAACCTAGAGTAGTGGAAAGTGCCTATTTCTCCTCAAACAAGTAATTCTGATGAA 2200  
2201 ACAATGAGAGTTGTCAAAGAAAAAGAGAACTATAATGGGTTATTAGTGGATAAAGAGACCACGATCAAAGAGAAGCTATGAGGGGACTTTGATCAGTGAAA 2300  
|||||  
2201 ACAATGAGAGTTGTCAAAGAAAAAGAGAACTATAATGGGTTATTAGTGGATAAAGAGACCACGATCAAAGAGAAGCTATGAGGGGACTTTGATCAGTGAAA 2300  
2301 ATTCTTACAGCAAAAAACACCTCTCAACCCCTAATGACTTGAGGAGCCTAGAAGAAGAAATTAAGAGCTACTATATCAAGTCTAATGGCTTGTGTTACGC 2400  
|||||  
2301 ATTCTTACAGCAAAAAACACCTCTCAACCCCTAATGACTTGAGGAGCCTAGAAGAAGAAATTAAGAGCTACTATATCAAGTCTAATGGCTTGTGTTACGC 2400  
2401 TAATGGCATCAGTCTCTATGCAAAAATCAAAAACGACCCCTATAAAGAGGGAATGCTGTGTGGTTATGAGAGCGTTCAAAATCTGCTCTCACCTTTAAAG 2500  
|||||  
2401 TAATGGCATCAGTCTCTATGCAAAAATCAAAAACGACCCCTATAAAGAGGGAATGCTGTGTGGTTATGAGAGCGTTCAAAATCTGCTCTCACCTTTAAAG 2500  
2501 GACAAGCTCAAATACGACAAGCAAAGTTACAAAAGCGTTACTGAAAGATTCAAAGTAAATTAAGTTTTGTTGGGAAATGGATTGGTCTGACTTTAT 2600  
|||||  
2501 GACAAGCTCAAATACGACAAGCAAAGTTACAAAAGCGTTACTGAAAGATTCAAAGTAAATTAAGTTTTGTTGGGAAATGGATTGGTCTGACTTTAT 2600  
2601 TTCTTAATTCCTTAGCCTATCCATGCCAAAAGGTAACCATCACTTTCAAGCAATACGAAAATCTCACCCAAATCCGTCAAAGAGGCTGCGACAATGAAGT 2700  
|||||  
2601 TTCTTAATTCCTTAGCCTATCCATGCCAAAAGGTAACCATCACTTTCAAGCAATACGAAAATCTCACCCAAATCCGTCAAAGAGGCTGCGACAATGAAGT 2700  
2701 GGTGTGCAGAACGCTCATTCTATCGCTTTATTAGAAAAGCTCTCTAGGGTTGAACAACAAGCGTGAAATTTCCCTTAAAGACACTTCTTATTCCATGTTT 2800  
|||||  
2701 GGTGTGCAGAACGCTCATTCTATCGCTTTATTAGAAAAGCTCTCTAGGGTTGAACAACAAGCGTGAAATTTCCCTTAAAGACACTTCTTATTCCATGTTT 2800  
2801 CATATCACTTTAAACACCGCTAAAAGTCTACCTTACCTATTCTAAAACGCTCCTCAAGTCAAATGCTCAATGATGTGGGTTTTGCGATCCAATTAG 2900  
|||||  
2801 CATATCACTTTAAACACCGCTAAAAGTCTACCTTACCTATTCTAAAACGCTCCTCAAGTCAAATGCTCAATGATGTGGGTTTTGCGATCCAATTAG 2900  
2901 CCAAACAAATTTTGAAGAAAATTTTGACTACTACAAACAAAATATCCCAACAAAAGCGTGATCAATTAGTGGAATGGCAATAGGCGCTTACAATGG 3000  
|||||  
2901 CCAAACAAATTTTGAAGAAAATTTTGACTACTACAAACAAAATATCCCAACAAAAGCGTGATCAATTAGTGGAATGGCAATAGGCGCTTACAATGG 3000  
3001 GGGAAATGAAACACAACCCTAATGGCGCTTATGTGAAGAAGTTTCGCTGCATTATTCTCAAGTGCATATAACGAATAAAGCATGCTAGAACTAACTTAT 3100  
|||||  
3001 GGGAAATGAAACACAACCCTAATGGCGCTTATGTGAAGAAGTTTCGCTGCATTATTCTCAAGTGCATATAACGAATAAAGCATGCTAGAACTAACTTAT 3100  
3101 TTTGAATCTTTATAATTTTATAAGCAATCTTGGTGGTATACTCCTACTATCTTACAATTTATAATAATATTATTGCATCATTATCTTTAATCTTTT 3200  
|||||  
3101 TTTGAATCTTTATAATTTTATAAGCAATCTTGGTGGTATACTCCTACTATCTTACAATTTATAATAATATTATTGCATCATTATCTTTAATCTTTT 3200  
3201 TAAAATATATTTTGATTCCTTTTGTGAAGATATCTGTCTTTTATTTTGGAAATAGGCTTTTGCCTTCCTTATAAGAACATATAGCGTAAGAAATCT 3300  
|||||  
3201 TAAAATATATTTTGATTCCTTTTGTGAAGATATCTGTCTTTTATTTTGGAAATAGGCTTTTGCCTTCCTTATAAGAACATATAGCGTAAGAAATCT 3300  
3301 TCCAATTTGCACCATTTTCTCTGAGCATGGGTGCTGTAAGAATGACTTGATGAATTTAACCTGGTGCATGCAACAATCCACTAAGAGCGATGGTTGGCA 3400  
|||||  
3301 TCCAATTTGCACCATTTTCTCTGAGCATGGGTGCTGTAAGAATGACTTGATGAATTTAACCTGGTGCATGCAACAATCCACTAAGAGCGATGGTTGGCA 3400  
3401 AAACAAAGAACACACAAGCTTTTGGTGAAGTAAATCCATTAAGATATAGGAAAATCAAACGCTTCATGCAAGACAAAGATTATTTTGTAGTAAAGC 3500  
|||||  
3401 AAACAAAGAACACACAAGCTTTTGGTGAAGTAAATCCATTAAGATATAGGAAAATCAAACGCTTCATGCAAGACAAAGATTATTTTGTAGTAAAGC 3500  
3501 AACGCTTGATCTGATTTTGAAGATTTCCAAAACGAAATCAATGATTAGAAATTAATAACAGTTCGCTTGAACCCACAGGCACTAAAGATTTATCATA 3600  
|||||  
3501 AACGCTTGATCTGATTTTGAAGATTTCCAAAACGAAATCAATGATTAGAAATTAATAACAGTTCGCTTGAACCCACAGGCACTAAAGATTTATCATA 3600  
3601 ACTCAATTCACCTCTAGTTTTAGCGGCTTGCAAAATCATCATAGAAAGTGCCTGATTAGGCACTTTCCCAATTTGTATTTCTTGCTCAAGCTTGGACTT 3700  
|||||  
3601 ACTCAATTCACCTCTAGTTTTAGCGGCTTGCAAAATCATCATAGAAAGTGCCTGATTAGGCACTTTCCCAATTTGTATTTCTTGCTCAAGCTTGGACTT 3700



3701 ACCTTAATGAGTTCATCGGTGAAGAATGGATCATCATAGTAAAGCGCCTTGTGGCACTTGATAGGTTTGAGCGTATTCTCTAGAATGATAAGCTCATCGC 3800  
|||||  
3701 ACCTTAATGAGTTCATCGGTGAAGAATGGATCATCATAGTAAAGCGCCTTGTGGCACTTGATAGGTTTGAGCGTATTCTCTAGAATGATAAGCTCATCGC 3800  
3801 CCATAGTCATCAATTTCATCAGGGGTCATCAAAAACCGCTCTTTTGTGTGTCGATAGAAGTGTGGTCTTACCTGTATTATCATCAATGCTTCGGCTCACGTC 3900  
|||||  
3801 CCATAGTCATCAATTTCATCAGGGGTCATCAAAAACCGCTCTTTTGTGTGTCGATAGAAGTGTGGTCTTACCTGTATTATCATCAATGCTTCGGCTCACGTC 3900  
3901 TTGCCCTTGTGTTTTCCCTAATACCTTTAGAAAGTTTTTCAAATGTTTCATAGTAGTTATCGTTGTAAATCCATAATACATATTCAAAGAAAGGTTGTCT 4000  
|||||  
3901 TTGCCCTTGTGTTTTCCCTAATACCTTTAGAAAGTTTTTCAAATGTTTCATAGTAGTTATCGTTGTAAATCCATAATACATATTCAAAGAAAGGTTGTCT 4000  
4001 AAAATAGTCTTAGCGCCATTCTACCATAACCAAGTGGGGGTCATTCTCTAGTTGCGCCTTACTTTGAAACACAAAAGCGGGGCGCATGTTGTATTCTG 4100  
|||||  
4001 AAAATAGTCTTAGCGCCATTCTACCATAACCAAGTGGGGGTCATTCTCTAGTTGCGCCTTACTTTGAAACACAAAAGCGGGGCGCATGTTGTATTCTG 4100  
4101 CCATAATCCCTACCGCTTTAACAAGGTCCTAAATAGCCACAGAGCGTGAATTCATCCATAAGCATTAAAGCAACTTCTTTGCAATTGTGGATCATGGAT 4200  
|||||  
4101 CCATAATCCCTACCGCTTTAACAAGGTCCTAAATAGCCACAGAGCGTGAATTCATCCATAAGCATTAAAGCAACTTCTTTGCAATTGTGGATCATGGAT 4200  
4201 TGGCAGAATAAGATTGCTATAAATCATCACATTA AAAAACAGCTCTAGTATCGGCCAACAAATAGTGCCTTTCTTTGGGGTTAGCGATCACGCCAATGCTG 4300  
|||||  
4201 TGGCAGAATAAGATTGCTATAAATCATCACATTA AAAAACAGCTCTAGTATCGGCCAACAAATAGTGCCTTTCTTTGGGGTTAGCGATCACGCCAATGCTG 4300  
4301 ACCTCATCAATCCTTAAACGCCTGAAATCAAATCATTAGCGCTCGTGAATTCCTGATCATAGCGTTATTGTAAGGCGCAAACGCTGATGTATAGACCC 4400  
|||||  
4301 ACCTCATCAATCCTTAAACGCCTGAAATCAAATCATTAGCGCTCGTGAATTCCTGATCATAGCGTTATTGTAAGGCGCAAACGCTGATGTATAGACCC 4400  
4401 CTTGAACAGAGCTGTAAGTTTCTTTAGCGCCACCCATTGTCTTAAAGTGTGCCACATGTTTCTAGTAGCAGGATTAAGCACTCTTAGATTGTGCGCCACT 4500  
|||||  
4401 CTTGAACAGAGCTGTAAGTTTCTTTAGCGCCACCCATTGTCTTAAAGTGTGCCACATGTTTCTAGTAGCAGGATTAAGCACTCTTAGATTGTGCGCCACT 4500  
4501 CTTATCTTCTTACCTCCAAAAAATTCATCAGAGACACGACTTTTTCCATGTTTGTGTCTTCATCAATCAAATTGATACCGCTTGCCATAGAACCTATG 4600  
|||||  
4501 CTTATCTTCTTACCTCCAAAAAATTCATCAGAGACACGACTTTTTCCATGTTTGTGTCTTCATCAATCAAATTGATACCGCTTGCCATAGAACCTATG 4600  
4601 AAAAACATCGTGGGGGTTTCAGGCATGATGATTTTTTTCTTTTGACAAACTCAAGCCCTTTTGTAGTCCACATGAGATCCCTATAAATATTGCAATTGA 4700  
|||||  
4601 AAAAACATCGTGGGGGTTTCAGGCATGATGATTTTTTTCTTTTGACAAACTCAAGCCCTTTTGTAGTCCACATGAGATCCCTATAAATATTGCAATTGA 4700  
4701 TGACAAAGAGATTTTCGCGCTTGATTGCTAAAAAAGGATCTTTTTCATTGGGTCTTTCAGGGAACACGAGCTTAGCCAATCCAAAGATTGAGTGAAAA 4800  
|||||  
4701 TGACAAAGAGATTTTCGCGCTTGATTGCTAAAAAAGGATCTTTTTCATTGGGTCTTTCAGGGAACACGAGCTTAGCCAATCCAAAGATTGAGTGAAAA 4800  
4801 ATCCCCCCTAGCCACCATCCCATGCCCTTTTAGGCGTGTGTCAATTTGAGAGAGTATGTCTTCAGTCAAACCACATCATTACCAAAATCCACATA 4900  
|||||  
4801 ATCCCCCCTAGCCACCATCCCATGCCCTTTTAGGCGTGTGTCAATTTGAGAGAGTATGTCTTCAGTCAAACCACATCATTACCAAAATCCACATA 4900  
4901 GCGAAAGGATTAATCGGTGTGTTTTTAAGGAGAAAGGTTTCATAGATGAACACTTTTTGGTTGAAGCGTTTTTCTCTGATTTTTCCGCAAGTCTCCATAG 5000  
|||||  
4901 GCGAAAGGATTAATCGGTGTGTTTTTAAGGAGAAAGGTTTCATAGATGAACACTTTTTGGTTGAAGCGTTTTTCTCTGATTTTTCCGCAAGTCTCCATAG 5000  
5001 TGTGAGCTTTAGGGTCAAACACAACGATATTTGAGGATAATTGATCATATTTGGGCATGATGAAACCCACCCCTTACCGCTTCTAGTAGGAGCAATCAA 5100  
|||||  
5001 TGTGAGCTTTAGGGTCAAACACAACGATATTTGAGGATAATTGATCATATTTGGGCATGATGAAACCCACCCCTTACCGCTTCTAGTAGGAGCAATCAA 5100  
5101 GCCAATGAACGCTGCCCTGCGTAAGCGATAAAAATCCCCAAGCCACGCTGCCTACAATACCTCTCGTTTGTCAAAGGTGCGTTTTTTATTGTTGGGC 5200  
|||||  
5101 GCCAATGAACGCTGCCCTGCGTAAGCGATAAAAATCCCCAAGCCACGCTGCCTACAATACCTCTCGTTTGTCAAAGGTGCGTTTTTTATTGTTGGGC 5200  
5201 GTGATGAGCTTGGCTTTGATCATTCTCTCAGTTTCCAACTCGCGCTACCAAGAGATCATCAACTTTTTTATTGCTCCTATATCTCTAGTCCGAG 5300  
|||||  
5201 GTGATGAGCTTGGCTTTGATCATTCTCTCAGTTTCCAACTCGCGCTACCAAGAGATCATCAACTTTTTTATTGCTCCTATATCTCTAGTCCGAG 5300  
5301 TTAAGTATTTTAAGAACCACAAAAAAGGTAATGAAGATATAAGAGCATAAAAATAGAACTATATACGACTAAGGATATATTGAACCCATAAATTTGAG 5400  
|||||  
5301 TTAAGTATTTTAAGAACCACAAAAAAGGTAATGAAGATATAAGAGCATAAAAATAGAACTATATACGACTAAGGATATATTGAACCCATAAATTTGAG 5400  
5401 TGAACATAAAACAAAGCGCCTTAAAAATAGTATGCAGGAAAAATCTTGATCGCATAGATCCATATATCAAAAAGATCATCATCGCTCTCAGGCGATCGATTA 5500  
|||||  
5401 TGAACATAAAACAAAGCGCCTTAAAAATAGTATGCAGGAAAAATCTTGATCGCATAGATCCATATATCAAAAAGATCATCATCGCTCTCAGGCGATCGATTA 5500  
5501 TCATCATAAAAATTACCTAAGAGAATCAAGAAAAATAATCCCTGATGTGATAAAAAGAAATAGGATAGTAATAGTATAGCTTGCAACCAAAGCCAAAGGTTT 5600  
|||||  
5501 TCATCATAAAAATTACCTAAGAGAATCAAGAAAAATAATCCCTGATGTGATAAAAAGAAATAGGATAGTAATAGTATAGCTTGCAACCAAAGCCAAAGGTTT 5600  
5601 TAACCCCTTCTTTTACGCCATCTATAATGATTTCTTTAAAGCTTTTTTCTTTTGGAGGCTGGTTAGCTTTATCTTTAAAGCCTTTTTTTGAGCTTTTAT 5700  
|||||  
5601 TAACCCCTTCTTTTACGCCATCTATAATGATTTCTTTAAAGCTTTTTTCTTTTGGAGGCTGGTTAGCTTTATCTTTAAAGCCTTTTTTTGAGCTTTTAT 5700

5701 GAATTTGTAAGAAAAATAACGCTATTAACCCCTATGAAACTAAAAATAACAACCAACTTATAATCCTCTATGAAATATAAGGTGTTATACAAAAAGTCT 5800  
|||||  
5701 GAATTTGTAAGAAAAATAACGCTATTAACCCCTATGAAACTAAAAATAACAACCAACTTATAATCCTCTATGAAATATAAGGTGTTATACAAAAAGTCT 5800  
5801 TCCATTGTGCCTACTACCTATGTTTGATATAAAATTCATCACACTGTTTGTGGTGGTTGATATGGACAATCATATCAATCAAACTTTAAAGCCCTCAAT 5900  
|||||  
5801 TCCATTGTGCCTACTACCTATGTTTGATATAAAATTCATCACACTGTTTGTGGTGGTTGATATGGACAATCATATCAATCAAACTTTAAAGCCCTCAAT 5900  
5901 AAGACTTTCAAACCTTGATATTCCCTTGCTGCGCTATTAGATGAACTCATGTTGGCCAAACGGATAAAACGCTTCTTCACTGCTCCCTGCATGCAGAGTGGTT 6000  
|||||  
5901 AAGACTTTCAAACCTTGATATTCCCTTGCTGCGCTATTAGATGAACTCATGTTGGCCAAACGGATAAAACGCTTCTTCACTGCTCCCTGCATGCAGAGTGGTT 6000  
6001 AGTGTGCCTTTATGACCCTACAAAAGCACATTATAAAAAATCGTATGCCTCACTGCTTCTGAGTTCCCTAAAATGATTCTATCAGGCCCGATTCTCAGAC 6100  
|||||  
6001 AGTGTGCCTTTATGACCCTACAAAAGCACATTATAAAAAATCGTATGCCTCACTGCTTCTGAGTTCCCTAAAATGATTCTATCAGGCCCGATTCTCAGAC 6100  
6101 ATGACTTTAAGCAATCAGCAGAGGTGATATTTCCACCAAAAAAAGCTGTGTAGTGTGTTTGTGGTGGTTGAATACGATCTCTTCGGTGTCTCAATGGA 6200  
|||||  
6101 ATGACTTTAAGCAATCAGCAGAGGTGATATTTCCACCAAAAAAAGCTGTGTAGTGTGTTTGTGGTGGTTGAATACGATCTCTTCGGTGTCTCAATGGA 6200  
6201 TATGATCCTTTCTTCTTTAGGATAAACTCCATGATGCTTTTGATATAAGTCGTTTTACCCTTCTGTGCCACCACAACAATCACATTTTTACCAATA 6300  
|||||  
6201 TATGATCCTTTCTTCTTTAGGATAAACTCCATGATGCTTTTGATATAAGTCGTTTTACCCTTCTGTGCCACCACAACAATCACATTTTTACCAATA 6300  
6301 GCAATACCATCTTTAATCGCGCTGATCGCTTGTCTTTGTTGTCTAGTAGATTATAAAAAACCTTGTCTTCAAAGAAGCTATGAGGATAGGTTGTTTTGC 6400  
|||||  
6301 GCAATACCATCTTTAATCGCGCTGATCGCTTGTCTTTGTTGTCTAGTAGATTATAAAAAACCTTGTCTTCAAAGAAGCTATGAGGATAGGTTGTTTTGC 6400  
6401 TAGGTATCCTTATGGATATGGAATGGTTTCATCATTAACTGTAACAGGGGAAAGGACAATCTGCACCTTTCACCATTCGCTAAATGCTGCTCAAAAT 6500  
|||||  
6401 TAGGTATCCTTATGGATATGGAATGGTTTCATCATTAACTGTAACAGGGGAAAGGACAATCTGCACCTTTCACCATTCGCTAAATGCTGCTCAAAAT 6500  
6501 AGGATTTTCATAGTTGTCTATTGTTTTTTTCTTAAACTTGCAACACCCGAGCAAAATGCATTAACGGGACAGGCTAAAGGCTTCTCTGTCTCTCACA 6600  
|||||  
6501 AGGATTTTCATAGTTGTCTATTGTTTTTTTCTTAAACTTGCAACACCCGAGCAAAATGCATTAACGGGACAGGCTAAAGGCTTCTCTGTCTCTCACA 6600  
6601 TCAAAATGGTTGCCATTTCGCCATTATTTTTTAAACCCACACAACCTTGTCCCATTTGTAACAAATCTCAGTGATATTTCCATTTTTAAAAAATCACCAA 6700  
|||||  
6601 TCAAAATGGTTGCCATTTCGCCATTATTTTTTAAACCCACACAACCTTGTCCCATTTGTAACAAATCTCAGTGATATTTCCATTTTTAAAAAATCACCAA 6700  
6701 AAAGTTCTTCAGTAGCATGCCTTAGAGGATTTAATGCCGCTTCTTTTAAAGCTCTTCTACTTCTAGAAATTTTTATCTTCTGCACTCAATCTGTCTTC 6800  
|||||  
6701 AAAGTTCTTCAGTAGCATGCCTTAGAGGATTTAATGCCGCTTCTTTTAAAGCTCTTCTACTTCTAGAAATTTTTATCTTCTGCACTCAATCTGTCTTC 6800  
6801 AGTCATGTTCTTATTTCCAAATTTAATTTAATTTGGGTTATCAATTTAGCTCTTTCTAAAGAAGTGAAGTAAAGTCTATTTTTGCTCAAAATAATATATTT 6900  
|||||  
6801 AGTCATGTTCTTATTTCCAAATTTAATTTAATTTGGGTTATCAATTTAGCTCTTTCTAAAGAAGTGAAGTAAAGTCTATTTTTGCTCAAAATAATATATTT 6900  
6901 AGTCCCTATATCTTGGACAATCTCATTGAGCTTCCTTCCAAAATCATCTATCCCTAGGATCTGAAACGCTACGCCCATCATATTGCCATCTATGAATGGC 7000  
|||||  
6901 AGTCCCTATATCTTGGACAATCTCATTGAGCTTCCTTCCAAAATCATCTATCCCTAGGATCTGAAACGCTACGCCCATCATATTGCCATCTATGAATGGC 7000  
7001 GGTAAATACTCTCTTGGCAGATAAGAAGCCACTAGGCTGAAATCTTGGCACTTTCATCACACGTAAATATTGAAGTTGTCAGAAATTTCTGCAACAA 7100  
|||||  
7001 GGTAAATACTCTCTTGGCAGATAAGAAGCCACTAGGCTGAAATCTTGGCACTTTCATCACACGTAAATATTGAAGTTGTCAGAAATTTCTGCAACAA 7100  
7101 ACTCTCCAAGCGTTAGTTCATTTTTGATCGTGCTTCTGCAAAAAGTCTTTCTGTGTTGCAACGATTTGTAAGTGGCTAACACAAGGTTGTTCAAATAGTT 7200  
|||||  
7101 ACTCTCCAAGCGTTAGTTCATTTTTGATCGTGCTTCTGCAAAAAGTCTTTCTGTGTTGCAACGATTTGTAAGTGGCTAACACAAGGTTGTTCAAATAGTT 7200  
7201 GTAATAAGCATCAAACCTAATAAAATCTTTTGCATATTAATCTTAACTCTTGAACCTTCTCAAAAAATCTTGGGATCGTTGCTATCTTTTAAAGAA 7300  
|||||  
7201 GTAATAAGCATCAAACCTAATAAAATCTTTTGCATATTAATCTTAACTCTTGAACCTTCTCAAAAAATCTTGGGATCGTTGCTATCTTTTAAAGAA 7300  
7301 GAGGCGTAATTTGAATAAACTTATCCCTTACTTCAATTTGCATTTCCATAAGAGAGCTGTTGCTATCTAAGATCTTTTGTCTTCTGCTTCAATAAAC 7400  
|||||  
7301 GAGGCGTAATTTGAATAAACTTATCCCTTACTTCAATTTGCATTTCCATAAGAGAGCTGTTGCTATCTAAGATCTTTTGTCTTCTGCTTCAATAAAC 7400  
7401 CGAGTTCATTTGCTGTTTCCCTTTCATGTTTTTGGCTGGTTTTTTCCGCCACTACATCCTTTAGAAGAGCCGTGTTGTTGGTTTTGTCTTTATTTTGTAA 7500  
|||||  
7401 CGAGTTCATTTGCTGTTTCCCTTTCATGTTTTTGGCTGGTTTTTTCCGCCACTACATCCTTTAGAAGAGCCGTGTTGTTGGTTTTGTCTTTATTTTGTAA 7500  
7501 AGAACCGAGTTTGGTAACATATTTAGTAACATGAATATATTTATCCTTTCTCTTGAATTAATGCCACCTTTGGGGCTTGTGGTGATTTCTTCATGTTT 7600  
|||||  
7501 AGAACCGAGTTTGGTAACATATTTAGTAACATGAATATATTTATCCTTTCTCTTGAATTAATGCCACCTTTGGGGCTTGTGGTGATTTCTTCATGTTT 7600  
7601 TCTAGACAAAGTTTTAGTCTTTGTTTGATAATTTTCATCTACCACAGATTTGTTGGTAATTTTAAACATCATAACGCCACTAAAATCAATATCGTCCATT 7700  
|||||  
7601 TCTAGACAAAGTTTTAGTCTTTGTTTGATAATTTTCATCTACCACAGATTTGTTGGTAATTTTAAACATCATAACGCCACTAAAATCAATATCGTCCATT 7700

7701 GTGAGAACTCTTAATACTATCGCCCTCATTGTTGTA AAAACTTGGGGGATATTCATCAGTTGCCCTAGAATTTGATTAGACATCTGGGCTGAACCTTGCA 7800  
7701 GTGAGAACTCTTAATACTATCGCCCTCATTGTTGTA AAAACTTGGGGGATATTCATCAGTTGCCCTAGAATTTGATTAGACATCTGGGCTGAACCTTGCA 7800  
7801 TACTACCATTGATAGCTTGACCCAAAGCGTAATTAATTCAGGTGTCCTTCACTTCTACCTTTGCCAAGACCTATGAGTTTATCTAGAGCTATGATAGG 7900  
7801 TACTACCATTGATAGCTTGACCCAAAGCGTAATTAATTCAGGTGTCCTTCACTTCTACCTTTGCCAAGACCTATGAGTTTATCTAGAGCTATGATAGG 7900  
7901 CGCAGTTTGCAAGAAGCTATTAACCACGCTTGCTATCACAGCAAAGCCTATGCGCTTCATAAAGTGATTATTCACATAGCCATCTACCCCTGCTTCACCC 8000  
7901 CGCAGTTTGCAAGAAGCTATTAACCACGCTTGCTATCACAGCAAAGCCTATGCGCTTCATAAAGTGATTATTCACATAGCCATCTACCCCTGCTTCACCC 8000  
8001 AACATGCCTGCTGCTTGAGCGCTTTGCTAGAGGTATTATCACACCATCAGGCGTAATGGCTTTAGTAAAGACTATCATTAAAGCGTGCATAATAGGTGTGC 8100  
8001 AACATGCCTGCTGCTTGAGCGCTTTGCTAGAGGTATTATCACACCATCAGGCGTAATGGCTTTAGTAAAGACTATCATTAAAGCGTGCATAATAGGTGTGC 8100  
8101 CACCTTTCACGCTTTGATAATCCCATACACCTTAGTGCCCTTATCTAGTAAGATCATAGTGCCGTTTCATGTTCCATACATCTTTGGCTACAACCCCACT 8200  
8101 CACCTTTCACGCTTTGATAATCCCATACACCTTAGTGCCCTTATCTAGTAAGATCATAGTGCCGTTTCATGTTCCATACATCTTTGGCTACAACCCCACT 8200  
8201 CACTATACCTGTGAGAGTGGCATCTACTTTAGAAGTCAGAGTGATTTCATGGGGGTGATTGCGCTAAAACAAATGTGGGATCACTCTGCCTATAAAG 8300  
8201 CACTATACCTGTGAGAGTGGCATCTACTTTAGAAGTCAGAGTGATTTCATGGGGGTGATTGCGCTAAAACAAATGTGGGATCACTCTGCCTATAAAG 8300  
8301 GCCTGTTTGACAGGGCTTGTTCATCTTGTGTTTTCTGCTTTCTTTTTGTCATCAATGGGATTACCATTTTCATCTACAAATFCCCCATCTTTTCTTTTT 8400  
8301 GCCTGTTTGACAGGGCTTGTTCATCTTGTGTTTTCTGCTTTCTTTTTGTCATCAATGGGATTACCATTTTCATCTACAAATFCCCCATCTTTTCTTTTT 8400  
8401 TGTTCCTAAGAGCGATTTCACTGATATCTTAGCAGTTTCTGCGACATCTTGTCTATCTTATTGCTTTCTACTTTAGCTTCTGCTGTGGATTTTTTACT 8500  
8401 TGTTCCTAAGAGCGATTTCACTGATATCTTAGCAGTTTCTGCGACATCTTGTCTATCTTATTGCTTTCTACTTTAGCTTCTGCTGTGGATTTTTTACT 8500  
8501 TTTTCTTTTATCGTCATCTTTTTTATTGCCACCTAAAGCCTTAGCTAATTTAGCTTCTAAATCTTATCCTTAATGGTTTTTCTGTTTCGTATTGTTG 8600  
8501 TTTTCTTTTATCGTCATCTTTTTTATTGCCACCTAAAGCCTTAGCTAATTTAGCTTCTAAATCTTATCCTTAATGGTTTTTCTGTTTCGTATTGTTG 8600  
8601 GTAATGTCGGGCTCTATGGAAGCATAAATAGGATTATCGCTAGCTATTTGTCCGCATCAACATAGTGCCGTTAATAGTGGCAATATCGCCGCCATTTT 8700  
8601 GTAATGTCGGGCTCTATGGAAGCATAAATAGGATTATCGCTAGCTATTTGTCCGCATCAACATAGTGCCGTTAATAGTGGCAATATCGCCGCCATTTT 8700  
8701 TGAAATCCATTGGCAACAACGGATAACCTTTAGCCGCCATGTTATCAAAGGTTTTGCGGTTTCTTAGATCGCTATAAATCCGATCCACTTCATCAGCTTG 8800  
8701 TGAAATCCATTGGCAACAACGGATAACCTTTAGCCGCCATGTTATCAAAGGTTTTGCGGTTTCTTAGATCGCTATAAATCCGATCCACTTCATCAGCTTG 8800  
8801 TCGTTTAATTCCTAGAATTAGCGCCCTTCACTATCGCTCAAGCCCTTAAACATTGCTCTATGGCTTGTGATCAGTAGGGTCACTAAGTTATCCAAG 8900  
8801 TCGTTTAATTCCTAGAATTAGCGCCCTTCACTATCGCTCAAGCCCTTAAACATTGCTCTATGGCTTGTGATCAGTAGGGTCACTAAGTTATCCAAG 8900  
8901 CACTCGCTTGCCTGATGCAATCTTTCTGTTTTACTCAATTGATTTGTTGCTTTGTGTCCTTTTATTTTGGATTTCTGGATCAAATCGCTATAAAGGT 9000  
8901 CACTCGCTTGCCTGATGCAATCTTTCTGTTTTACTCAATTGATTTGTTGCTTTGTGTCCTTTTATTTTGGATTTCTGGATCAAATCGCTATAAAGGT 9000  
9001 TTTGGCATTTCCTTTTTCTTTCATCGGTCCTAGCCGTTTTCAAACAATCCAAGACAGCCTTTTCTTAGCTTCTTGCAGGTATTTGAGCTTCTCTTCATC 9100  
9001 TTTGGCATTTCCTTTTTCTTTCATCGGTCCTAGCCGTTTTCAAACAATCCAAGACAGCCTTTTCTTAGCTTCTTGCAGGTATTTGAGCTTCTCTTCATC 9100  
9101 GCTCAAACCATCCAACACTTCATGATAGCCGCTCTGTCGTTAGGATCGGCGTTTTCAAGCAATCTTTGATCGCTTTATCTTTTTGTTGGAGTTCTTTT 9200  
9101 GCTCAAACCATCCAACACTTCATGATAGCCGCTCTGTCGTTAGGATCGGCGTTTTCAAGCAATCTTTGATCGCTTTATCTTTTTGTTGGAGTTCTTTT 9200  
9201 GCTAAAAATTTCTCGCTTACAGGGGTAGCAATTTCTCGCATTCTTTTTCTCTTTTTCATTCTAGCTTGTATACGCAGTCCAATAAGCCTTAACGC 9300  
9201 GCTAAAAATTTCTCGCTTACAGGGGTAGCAATTTCTCGCATTCTTTTTCTCTTTTTCATTCTAGCTTGTATACGCAGTCCAATAAGCCTTAACGC 9300  
9301 TCTTCTTAACTTCTTGTCTAAGAGTTTTCTCGCTTACAGGGGTAGTAATTTCTCGCAAGCTCTCTTTCTTCTTCAATTTCTAGCTTGAGAGAGGCAGTC 9400  
9301 TCTTCTTAACTTCTTGTCTAAGAGTTTTCTCGCTTACAGGGGTAGTAATTTCTCGCAAGCTCTCTTTCTTCTTCAATTTCTAGCTTGAGAGAGGCAGTC 9400  
9401 TTTATAAGCTTTAAGACTCTCTTTAGCTAAAACATTTTCTGTAAGTCTTTAGGGAGATTTTAAAGACATGCTTTTCTTTCTTCTTCAATTTCCAGCTTTT 9500  
9401 TTTATAAGCTTTAAGACTCTCTTTAGCTAAAACATTTTCTGTAAGTCTTTAGGGAGATTTTAAAGACATGCTTTTCTTTCTTCTTCAATTTCCAGCTTTT 9500  
9501 TCCAACAATTTAGCACTTGCTTCGCTAAGAATTTCTCGCTTACAGGGGTAGTAATTTCTCGCATTCTTTTTTCTCAGCTTCAAGTTTGGCTTGAGATA 9600  
9501 TCCAACAATTTAGCACTTGCTTCGCTAAGAATTTCTCGCTTACAGGGGTAGTAATTTCTCGCATTCTTTTTTCTCAGCTTCAAGTTTGGCTTGAGATA 9600  
9601 CGCAATCCAATAAGCCTTAACGCTCTTCTTAACTTCTTGTCTAAGAGTTTCTCGCTTACAGGGGTAGTAGTTTCTCGCAAGCTCTCCTTTCTTCTTC 9700  
9601 CGCAATCCAATAAGCCTTAACGCTCTTCTTAACTTCTTGTCTAAGAGTTTCTCGCTTACAGGGGTAGTAGTTTCTCGCAAGCTCTCCTTTCTTCTTC 9700



11494 CTTGAACTTTTGTTGGTTCAGTAAGCTTTTTTCAGGTTTCATCTTTGATTAATCTAAACACTTGATCCTTTCTTCTCAGTTTTGGCATTTTTGAT 11593  
|||||  
11701 CTTGAACTTTTGTTGGTTCAGTAAGCTTTTTTCAGGTTTCATCTTTGATTAATCTAAACACTTGATCCTTTCTTCTCAGTTTTGGCATTTTTGAT 11800  
|||||  
11594 GCAGTCATTATAAGCCTCTAGAGTCTTTTTCATCTGATCTTGAAGTTTTTTGTCTTTGATAAGCTTCAAACATTCTCATAGTTGCCACCATTACTAATA 11693  
|||||  
11801 GCAGTCATTATAAGCCTCTAGAGTCTTTTTCATCTGATCTTGAAGTTTTTTGTCTTTGATAAGCTTCAAACATTCTCATAGTTGCCACCATTACTAATA 11900  
|||||  
11694 CATTTCATAAAAAGGCTCTCAACGGGTTTTTGTCCCTCAATTTCTGCAATATTTAAATAGTTGTATAAGGTTCTATTGGGATCGTCATTGAAGAAAAGATTCT 11793  
|||||  
11901 CATTTCATAAAAAGGCTCTCAACGGGTTTTTGTCCCTCAATTTCTGCAATATTTAAATAGTTGTATAAGGTTCTATTGGGATCGTCATTGAAGAAAAGATTCT 12000  
|||||  
11794 TATCGATCATATTGCCTTTTTCATCCGTTCTTTTCAGCAATCGGTTATACTCTTGCCCTTATTGGATTTCATCATTAAACATAAAGATTCCCTGTCTTTGCT 11893  
|||||  
12001 TATCGATCATATTGCCTTTTTCATCCGTTCTTTTCAGCAATCGGTTATACTCTTGCCCTTATTGGATTTCATCATTAAACATAAAGATTCCCTGTCTTTGCT 12100  
|||||  
11894 AAAACGAGAGCTTTTATCTTCCAAAGGCATGAAGTAGTGAAAAATGCTTCTAGAAAATAAAATAATCACGATAAGAACAGCGACTACAATGCCACCAATA 11993  
|||||  
12101 AAAACGAGAGCTTTTATCTTCCAAAGGCATGAAGTAGTGAAAAATGCTTCTAGAAAATAAAATAATCACGATAAGAACAGCGACTACAATGCCACCAATA 12200  
|||||  
11994 ATATATTTCTTTTGGCTCCCTTGATAATTTCTTGATCGTTAGAGTCGTTAGTTATTTCTTCTGACTTGCTTTCATCAAAATGGTTTTAGTTTCTGTGG 12093  
|||||  
12201 ATATATTTCTTTTGGCTCCCTTGATAATTTCTTGATCGTTAGAGTCGTTAGTTATTTCTTCTGACTTGCTTTCATCAAAATGGTTTTAGTTTCTGTGG 12300  
|||||  
12094 GGTTATCAAGATAAAGGATCTGAGCTTTCTTTGGATTCTTTTGAAGAATCTTCAAAGTGATTGATCTCTGTTGCTTCTTCATTGGATAAATCTTGGGGTGA 12193  
|||||  
12301 GGTTATCAAGATAAAGGATCTGAGCTTTCTTTGGATTCTTTTGAAGAATCTTCAAAGTGATTGATCTCTGTTGCTTCTTCATTGGATAAATCTTGGGGTGA 12400  
|||||  
12194 ATGTTGTTGGGTTTTTTTGAAGTTTCATCATCAATTAAGCCCGTTTGAAGTTTCTTCTTGATACCCATTATTTTCTTGATCGTCTTCTTCGTTCAAGTTCT 12293  
|||||  
12401 ATGTTGTTGGGTTTTTTTGAAGTTTCATCATCAATTAAGCCCGTTTGAAGTTTCTTCTTGATACCCATTATTTTCTTGATCGTCTTCTTCGTTCAAGTTCT 12500  
|||||  
12294 TGGGTTCTTCATCTAAATCTTTTGGCTGAGTGAAAAGCTTTTATTATCAACTAATTTCTGGCTTTTTTGAATAACTTGCTGCTAGACTGCCATTGC 12393  
|||||  
12501 TGGGTTCTTCATCTAAATCTTTTGGCTGAGTGAAAAGCTTTTATTATCAACTAATTTCTGGCTTTTTTGAATAACTTGCTGCTAGACTGCCATTGC 12600  
|||||  
12394 TAGATTCTGAAGTTTCATCACCACCAGAATCCATTGAGTTTGGGTTTCTTCTGACTTGCTTTCATCAAAATGGTTTTAGTTTCTGTGGGGTTATCAAG 12493  
|||||  
12601 TAGATTCTGAAGTTTCATCACCACCAGAATCCATTGAGTTTGGGTTTCTTCTGACTTGCTTTCATCAAAATGGTTTTAGTTTCTGTGGGGTTATCAAG 12700  
|||||  
12494 ATAAGGATCTGAGCTTTCTTTGGATTCTTTTGAAGAATCTTCAAAGTGATTGATCTCTGTTGCTTCTTCATTGGATAAATCTTGGGGTGAATGTTGTTGG 12593  
|||||  
12701 ATAAGGATCTGAGCTTTCTTTGGATTCTTTTGAAGAATCTTCAAAGTGATTGATCTCTGTTGCTTCTTCATTGGATAAATCTTGGGGTGAATGTTGTTGG 12800  
|||||  
12594 GTTTTTTTGAAGTTTCATCATCAATTAAGCCCGTTTGAAGTTTCTTCTTGATACCCATTATTTTCTTGATCGTCTTCTTCGTTCAAGTTCTTGGGTTTCTT 12693  
|||||  
12801 GTTTTTTTGAAGTTTCATCATCAATTAAGCCCGTTTGAAGTTTCTTCTTGATACCCATTATTTTCTTGATCGTCTTCTTCGTTCAAGTTCTTGGGTTTCTT 12900  
|||||  
12694 CATCTAAATCTTTTGGCTGAGTGAAAAGCTTTTATTATCAACTAATTTCTGGCTTTTTTGAATAACTTGCTGCTAGACTGCCATTGCTAGATTCTGA 12793  
|||||  
12901 CATCTAAATCTTTTGGCTGAGTGAAAAGCTTTTATTATCAACTAATTTCTGGCTTTTTTGAATAACTTGCTGCTAGACTGCCATTGCTAGATTCTGA 13000  
|||||  
12794 AGTTTCATCACCACCAGAATCCATTGAGTTTGGGTTTCTTCTGACTTGCTTCCATCAAAATGGTTTTAGTTTCTGTAGGGTTGTTAAGATGATGATCT 12893  
|||||  
13001 AGTTTCATCACCACCAGAATCCATTGAGTTTGGGTTTCTTCTGACTTGCTTCCATCAAAATGGTTTTAGTTTCTGTAGGGTTGTTAAGATGATGATCT 13100  
|||||  
12894 GAGCTTCTTTGGATTCTTTTGAAGAATCTTCAAATGATTGGCTTCTGTTGCTTCTTCATTGGATAAATCTTGGGGTGAATGTTGTTGGATTTTTTTAG 12993  
|||||  
13101 GAGCTTCTTTGGATTCTTTTGAAGAATCTTCAAATGATTGGCTTCTGTTGCTTCTTCATTGGATAAATCTTGGGGTGAATGTTGTTGGATTTTTTTAG 13200  
|||||  
12994 AAGTTTCAAGTTTATCGTTTTCTTCATTCATGTCTTAACGCCTTTTATTTATCTCTGACAAGAGGGAGCTTTTTAATCACGCGCTCCAATTCACCATAG 13093  
|||||  
13201 AAGTTTCAAGTTTATCGTTTTCTTCATTCATGTCTTAACGCCTTTTATTTATCTCTGACAAGAGGGAGCTTTTTAATCACGCGCTCCAATTCACCATAG 13300  
|||||  
13094 TTTTTGATATTGTAATTTTTTGTCAATGGATTTTCCCATAGCCTTTATTTACTGTTACAAGGGCTTTGTCTTTAATGAGCTTAAATTTTTCTGCAA 13193  
|||||  
13301 TTTTTGATATTGTAATTTTTTGTCAATGGATTTTCCCATAGCCTTTATTTACTGTTACAAGGGCTTTGTCTTTAATGAGCTTAAATTTTTCTGCAA 13400  
|||||  
13194 TTTCATTAACCTATACCATCTTAATCCATAAATGGTCATGTTAGGATCAATGGCAGCATCAGTCATGCTCAATTTCCCATCAGGTTGAACCACAAAAAT 13293  
|||||  
13401 TTTCATTAACCTATACCATCTTAATCCATAAATGGTCATGTTAGGATCAATGGCAGCATCAGTCATGCTCAATTTCCCATCAGGTTGAACCACAAAAAT 13500  
|||||  
13294 AGCAGGTTGGAGAGTGATGTTTTTGAACCAAAATAAGTGAATGTGCCATCATCAAAATTTTCAGAGGGCATAATATGTTTAGAGCGTTTTTCAGGTGCT 13393  
|||||  
13501 AGCAGGTTGGAGAGTGATGTTTTTGAACCAAAATAAGTGAATGTGCCATCATCAAAATTTTCAGAGGGCATAATATGTTTAGAGCGTTTTTCAGGTGCT 13600  
|||||  
13394 TGGTAGTAATTGAGTTTCTAGGCACAGGGTTCTTTTTAAGGCATTATGCACATATTGAGTCTCTAGCGCCTTTGCTTGATCTAAGATAATTTTTTGTT 13493  
|||||  
13601 TGGTAGTAATTGAGTTTCTAGGCACAGGGTTCTTTTTAAGGCATTATGCACATATTGAGTCTCTAGCGCCTTTGCTTGATCTAAGATAATTTTTTGTT 13700  
|||||

13494 TTCTCTCTCTATTTTTCTTGTGATAATCTGTTTCATTGCTCGCCATCATTACTCTATTGATGTAGGCTGTGGTGTAAAGATTTCTTGCTTAATCAA 13593  
|||||  
13701 TTCTCTCTCTATTTTTCTTGTGATAATCTGTTTCATTGCTCGCCATCATTACTCTATTGATGTAGGCTGTGGTGTAAAGATTTCTTGCTTAATCAA 13800  
|||||  
13594 TTCTTTCTGCCTCTTTGCTTCTTCTCTCTTTTTTAGCTCCTCTTCAATAACGCTAGAGACTTCGTGTCTTTGTGGGTATTCTAATTTGACTGTTAGATAC 13693  
|||||  
13801 TTCTTTCTGCCTCTTTGCTTCTTCTCTCTTTTTTAGCTCCTCTTCAATAACGCTAGAGACTTCGTGTCTTTGTGGGTATTCTAATTTGACTGTTAGATAC 13900  
|||||  
13694 GCCGAAGCAAAATTGCTTTTTGAGCTATTCTCAAAATGAATTGATACAAGGCTTTATTAGTTCGCACAACAAGATTAGTCTCCAAGCGCTATCGCTAG 13793  
|||||  
13901 GCCGAAGCAAAATTGCTTTTTGAGCTATTCTCAAAATGAATTGATACAAGGCTTTATTAGTTCGCACAACAAGATTAGTCTCCAAGCGCTATCGCTAG 14000  
|||||  
13794 GAGATAATTCTATGGAGTTATCCTCAGGACTTTTTGAGATTTATCTGTCTTAATATTGATTTTATCCTTGCTCTTTGTCTAACTGCCTCTTCAGCTTG 13893  
|||||  
14001 GAGATAATTCTATGGAGTTATCCTCAGGACTTTTTGAGATTTATCTGTCTTAATATTGATTTTATCCTTGCTCTTTGTCTAACTGCCTCTTCAGCTTG 14100  
|||||  
13894 TTTCTTGTGAGTTCTCAATTTGTTTGTGAGCGCATTAGCTTGAGCCTGTTCTTGATGTCCTTAGTCTAGTCCATTGGTCTAATTCATTTTCTCGTTGT 13993  
|||||  
14101 TTTCTTGTGAGTTCTCAATTTGTTTGTGAGCGCATTAGCTTGAGCCTGTTCTTGATGTCCTTAGTCTAGTCCATTGGTCTAATTCATTTTCTCGTTGT 14200  
|||||  
13994 TGCTTGATAAAATCGCTAAGATTTTTGTATTGCTCAAAATTTGTGGGTTACTCATAGCGTTAGTGAGATTTTCTAAATTGGCTCTATTTTTTGCACGCT 14093  
|||||  
14201 TGCTTGATAAAATCGCTAAGATTTTTGTATTGCTCAAAATTTGTGGGTTACTCATAGCGTTAGTGAGATTTTCTAAATTGGCTCTATTTTTTGCACGCT 14300  
|||||  
14094 CTTCTTTTCTTTTTCTCTTTTATCTTTTTGCGCTTTTTGCGCCTGTTCTTTAGCTTCTTTTTCTTTTTCTAGAGCTTTTTTTTGTCTCTCAATTTCTTT 14193  
|||||  
14301 CTTCTTTTCTTTTTCTCTTTTATCTTTTTGCGCTTTTTGCGCCTGTTCTTTAGCTTCTTTTTCTTTTTCTAGAGCTTTTTTTTGTCTCTCAATTTCTTT 14400  
|||||  
14194 AGGGTCGGGCGCATCTACGATAAGTTTTTTGTTTTTAAAAATCTTGGTAACTCTTGTGCTATTAGGGCAAATTCACCTGCTTCTTTTTCAACATGAGA 14293  
|||||  
14401 AGGGTCGGGCGCATCTACGATAAGTTTTTTGTTTTTAAAAATCTTGGTAACTCTTGTGCTATTAGGGCAAATTCACCTGCTTCTTTTTCAACATGAGA 14500  
|||||  
14294 TTACTTTTTACCGATTTAGGTTGAATGAATATATGATTAGAATTAGGCACAATACTCCAACCTTTATTGAAACCTGTTGTGATGTAAGAAATAGTTTCAT 14393  
|||||  
14501 TTACTTTTTACCGATTTAGGTTGAATGAATATATGATTAGAATTAGGCACAATACTCCAACCTTTATTGAAACCTGTTGTGATGTAAGAAATAGTTTCAT 14600  
|||||  
14394 CTTTTTCAAGTTGGATCAGTAACATTTGCTAATGAAGTCCAAATTTGAATAGGTTTTTTCATCTCCCAAAATAAGCAATCTTCTTATTACCACCTTTCCAC 14493  
|||||  
14601 CTTTTTCAAGTTGGATCAGTAACATTTGCTAATGAAGTCCAAATTTGAATAGGTTTTTTCATCTCCCAAAATAAGCAATCTTCTTATTACCACCTTTCCAC 14700  
|||||  
14494 CCTACCACGATTAATAATCTTAATGTCAAGTGTCTGCTCTTATTGCGCTAGATAAAAAATAAACAAGACAGAAACAGCCCAACAATTTTTTAAAAA 14593  
|||||  
14701 CCTACCACGATTAATAATCTTAATGTCAAGTGTCTGCTCTTATTGCGCTAGATAAAAAATAAACAAGACAGAAACAGCCCAACAATTTTTTAAAAA 14800  
|||||  
14594 AATGCTGCCCCATCAACAATTCCTCTTAAAAAATATTGTAATTTGAACACAAGAATAAAGTGGCTTATCCTTTAAACATAGATCCACCAACTCTTCCA 14693  
|||||  
14801 AATGCTGCCCCATCAACAATTCCTCTTAAAAAATATTGTAATTTGAACACAAGAATAAAGTGGCTTATCCTTTAAACATAGATCCACCAACTCTTCCA 14900  
|||||  
14694 ACCATTAAGGCATCTCTTCTCTATCCATTCTGCTACCATCCATAGAACAGAGCTGAAAAATGGTATTAACGATCGCATTGACACTCTCAATAATCGTCT 14793  
|||||  
14901 ACCATTAAGGCATCTCTTCTCTATCCATTCTGCTACCATCCATAGAACAGAGCTGAAAAATGGTATTAACGATCGCATTGACACTCTCAATAATCGTCT 15000  
|||||  
14794 CTATGAAACCTTTTTAAAAATAATAGGGTATCAAACTCGCAATAGTTGAATCGATACCTAGTCCCCCTTGATTGATGTTTTGTATAGCAACAGAGGGCGT 14893  
|||||  
15001 CTATGAAACCTTTTTAAAAATAATAGGGTATCAAACTCGCAATAGTTGAATCGATACCTAGTCCCCCTTGATTGATGTTTTGTATAGCAACAGAGGGCGT 15100  
|||||  
14894 TATGGTCAAATGAATGCCAATAATGCCAAAAACCAAAGAGCAAAATAGGAATAGCTAGAACCAAGATAAACAAATTTAATAAACCATATCAATATG 14993  
|||||  
15101 TATGGTCAAATGAATGCCAATAATGCCAAAAACCAAAGAGCAAAATAGGAATAGCTAGAACCAAGATAAACAAATTTAATAAACCATATCAATATG 15200  
|||||  
14994 TTTTTCATAGAATCTTTGAACCAATCTAGAACGATCAACATACTGCAATAGGGAACACAATACCGCTAAAAGCCCCGCTATCAAAGTTTTCACAACAA 15093  
|||||  
15201 TTTTTCATAGAATCTTTGAACCAATCTAGAACGATCAACATACTGCAATAGGGAACACAATACCGCTAAAAGCCCCGCTATCAAAGTTTTCACAACAA 15300  
|||||  
15094 CAGTGCTTATTCTCATAATGATAGTTACTTGCATAAAAAATAGCAAAACAAAGAAATACCTGCCACTTGCAAGCCTTGTAACAACTAGGAGCGTTGTTGCC 15193  
|||||  
15301 CAGTGCTTATTCTCATAATGATAGTTACTTGCATAAAAAATAGCAAAACAAAGAAATACCTGCCACTTGCAAGCCTTGTAACAACTAGGAGCGTTGTTGCC 15400  
|||||  
15194 AACATTAGAAAAACAGCTCTTACTGCAGGTAATAATGAATTAACAGTGAATTCAGCACTAAATCTAAAGCCCAAAAAAGAACTTGATTAGCCCAAAA 15293  
|||||  
15401 AACATTAGAAAAACAGCTCTTACTGCAGGTAATAATGAATTAACAGTGAATTCAGCACTAAATCTAAAGCCCAAAAAAGAACTTGATTAGCCCAAAA 15500  
|||||  
15294 GCGCCTGCTAAACCAAAATAATAGAATAAGAGATTTTATAAAGATAACCAAAACCTGCATAGGCGATAAAAAGAGACCATCGCCATTTGAATAATGTCC 15393  
|||||  
15501 GCGCCTGCTAAACCAAAATAATAGAATAAGAGATTTTATAAAGATAACCAAAACCTGCATAGGCGATAAAAAGAGACCATCGCCATTTGAATAATGTCC 15600  
|||||  
15394 CCCCACAAATCGCATGTATTCAAAACCTATGTTAATCTGAATACCATTTGAAATATCCCTCAATTTCAATAAAAGAAATGAAAACAAAAATCCCAAAAC 15493  
|||||  
15601 CCCCACAAATCGCATGTATTCAAAACCTATGTTAATCTGAATACCATTTGAAATATCCCTCAATTTCAATAAAAGAAATGAAAACAAAAATCCCAAAAC 15700  
|||||

15494 AATATAAATTAGGTAAGAAACAAAATCAAGATATGACCCCTTGCCCTATGATAATATCAGGCAGATTGACTACACCATATGCAGGAAGAACAGCAGCGTCC 15593  
|||||  
15701 AATATAAATTAGGTAAGAAACAAAATCAAGATATGACCCCTTGCCCTATGATAATATCAGGCAGATTGACTACACCATATGCAGGAAGAACAGCAGCGTCC 15800  
|||||  
15594 GCTCCTTTGACAACAGATTCTAATGCGACAAAAGCAAGCATGGCTGTAGTGTGTTTTGCAGTTTATTTGCAGTGAATCTTTACCAATCAGCCAAATTA 15693  
|||||  
15801 GCTCCTTTGACAACAGATTCTAATGCGACAAAAGCAAGCATGGCTGTAGTGTGTTTTGCAGTTTATTTGCAGTGAATCTTTACCAATCAGCCAAATTA 15900  
|||||  
15694 AACCATCGGCTGTAATATTCGTAGAAGCTTGAGCGGTTATTGAGCCAATTATTTGTA AAAAGAATATTGCCTTTCACATTGCCTCAACACCGCCTTTGGT 15793  
|||||  
15901 AACCATCGGCTGTAATATTCGTAGAAGCTTGAGCGGTTATTGAGCCAATTATTTGTA AAAAGAATATTGCCTTTCACATTGCCTCAACACCGCCTTTGGT 16000  
|||||  
15794 AAAATTCTGAATCTTGTGTCTCAAATGTCTAGCAGCTATCCATGGATACATCTATGTTTTTATTATCAATGCGTTCCACCAAAAATTACAGCCACTT 15893  
|||||  
16001 AAAATTCTGAATCTTGTGTCTCAAATGTCTAGCAGCTATCCATGGATACATCTATGTTTTTATTATCAATGCGTTCCACCAAAAATTACAGCCACTT 16100  
|||||  
15894 GATGGCGTTAGAGCAAAACCTTGTATAGCTGTAGCAACACTTGCCCATGCCGATCCCATAAAGGACCTAAAGTATTCAAATATTTACCAGATTGCTAG 15993  
|||||  
16101 GATGGCGTTAGAGCAAAACCTTGTATAGCTGTAGCAACACTTGCCCATGCCGATCCCATAAAGGACCTAAAGTATTCAAATATTTACCAGATTGCTAG 16200  
|||||  
15994 CGGCTAAACTTGTGGCTAATGGTGTGCTAAGCGCTTCGATCACACCTGCCCTGAACTCTTCCACTCCCTGATGCACCAATAGATGTATAGCCTGTCAA 16093  
|||||  
16201 CGGCTAAACTTGTGGCTAATGGTGTGCTAAGCGCTTCGATCACACCTGCCCTGAACTCTTCCACTCCCTGATGCACCAATAGATGTATAGCCTGTCAA 16300  
|||||  
16094 AATATCTGCAAAACCTTTGTGGTTAAAACATAACTCGGTATCAGCATGCAATAAACTGTTTGGTAAATTTTGAGATTGGAACAATGGGCAAAATCAATA 16193  
|||||  
16301 AATATCTGCAAAACCTTTGTGGTTAAAACATAACTCGGTATCAGCATGCAATAAACTGTTTGGTAAATTTTGAGATTGGAACAATGGGCAAAATCAATA 16400  
|||||  
16194 GCTTTCAACCAATTAGGAACAAATGAGAAAAAACTTATGATCGTTATTA AAAAGTCCTTTTCATGCTCTTATTGTTTTAATGCCTATTTTTTTGATTCC 16293  
|||||  
16401 GCTTTCAACCAATTAGGAACAAATGAGAAAAAACTTATGATCGTTATTA AAAAGTCCTTTTCATGCTCTTATTGTTTTAATGCCTATTTTTTTGATTCC 16500  
|||||  
16294 ACTTCTTTAATCTTTCTCAAATTTTCGCTTACTGTCTGTTGTTTTGTAATCCGTGATTTGAATGTCAAACACTTTGAAGCCAAAAGGTTGATGATAA 16393  
|||||  
16501 ACTTCTTTAATCTTTCTCAAATTTTCGCTTACTGTCTGTTGTTTTGTAATCCGTGATTTGAATGTCAAACACTTTGAAGCCAAAAGGTTGATGATAA 16600  
|||||  
16394 GATTTTCTTGAGAAGAGTTACCTCTAGCAAAATCATAATAAATAGTTACTGTTTTTTAGTAATATATTTCATAATTTCCATTGTATCGGGTGTGATTTT 16493  
|||||  
16601 GATTTTCTTGAGAAGAGTTACCTCTAGCAAAATCATAATAAATAGTTACTGTTTTTTAGTAATATATTTCATAATTTCCATTGTATCGGGTGTGATTTT 16700  
|||||  
16494 GATGGTAATGAAAAATGTTAATCTCGTTAAGGGACTATTTTGACTTTTTCTCTTTGTATGTTAGAGCTAATGATAGCTTCTGCTCGGACTTTATCTACG 16593  
|||||  
16701 GATGGTAATGAAAAATGTTAATCTCGTTAAGGGACTATTTTGACTTTTTCTCTTTGTATGTTAGAGCTAATGATAGCTTCTGCTCGGACTTTATCTACG 16800  
|||||  
16594 AATTGTCTGATATTTTCATTGAACATTCTCATTGCTTGGGTTTGAAACTCAGTCGCAATATTGCATTAGTTGATCCTTGCATCCCTCAAAGAATTTT 16693  
|||||  
16801 AATTGTCTGATATTTTCATTGAACATTCTCATTGCTTGGGTTTGAAACTCAGTCGCAATATTGCATTAGTTGATCCTTGCATCCCTCAAAGAATTTT 16900  
|||||  
16694 TACTATAACCAACAGCAATGAGACAAAATTTGAAGTTGCACTATCCACAACAGCTTCAGAATTGACAATTTGCCTAGCATCGGATCGTTTGACAATTTT 16793  
|||||  
16901 TACTATAACCAACAGCAATGAGACAAAATTTGAAGTTGCACTATCCACAACAGCTTCAGAATTGACAATTTGCCTAGCATCGGATCGTTTGACAATTTT 17000  
|||||  
16794 AAAATCTCCTGTGTATCGATCAATGCCATAAACAAATATATCCGTTTTCTTCAAAGGCATCATCATTACAATACTCGTTACAGCGGCGACATTGAGTGCC 16893  
|||||  
17001 AAAATCTCCTGTGTATCGATCAATGCCATAAACAAATATATCCGTTTTCTTCAAAGGCATCATCATTACAATACTCGTTACAGCGGCGACATTGAGTGCC 17100  
|||||  
16894 ATAGAGAGATAAAAAAGCCCTTTTGAAAGTCCTATTGGCCTTATTGAGTTAGCCAATCTATCAAGGGCTATCACACCCCAACCAAAATTTTCATCAATCA 16993  
|||||  
17101 ATAGAGAGATAAAAAAGCCCTTTTGAAAGTCCTATTGGCCTTATTGAGTTAGCCAATCTATCAAGGGCTATCACACCCCAACCAAAATTTTCATCAATCA 17200  
|||||  
16994 AGACTTCTTCGTTTTTTTTCCCTAACATGCGACAGCTTATTGTTAATATTGTTTGTGGTTGTAAAACCTTGAGAGATTTTTCATTA AAAACTCCTT 17093  
|||||  
17201 AGACTTCTTCGTTTTTTTTCCCTAACATGCGACAGCTTATTGTTAATATTGTTTGTGGTTGTAAAACCTTGAGAGATTTTTCATTA AAAACTCCTT 17300  
|||||  
17094 AAAATAACTCTAATCATAATCATAGCAAAATTTCTGTA AAAATATGTATTTGAAAAACCTTATAATAAGAATCTTTTGGATAAGGCGTTGAACAAAGA 17193  
|||||  
17301 AAAATAACTCTAATCATAATCATAGCAAAATTTCTGTA AAAATATGTATTTGAAAAACCTTATAATAAGAATCTTTTGGATAAGGCGTTGAACAAAGA 17400  
|||||  
17194 TTCCTTATAATAAATGTAAGTAGCGGATTGCTTCAAACAAGAAGCAAGATGAAATACGATGCAACTCAAAGAGTAAAGAGCAGTGAAGCAGTCGTAAC 17293  
|||||  
17401 TTCCTTATAATAAATGTAAGTAGCGGATTGCTTCAAACAAGAAGCAAGATGAAATACGATGCAACTCAAAGAGTAAAGAGCAGTGAAGCAGTCGTAAC 17500  
|||||  
17294 CCAGTAATGAAATTTTGAAGCGCCTAATTTAAAGAGATAAGACAATCACAACCTCAGAGAGAGAATGGTATAATAACAAAACAATTTCTCAATTTAATTC 17393  
|||||  
17501 CCAGTAATGAAATTTTGAAGCGCCTAATTTAAAGAGATAAGACAATCACAACCTCAGAGAGAGAATGGTATAATAACAAAACAATTTCTCAATTTAATTC 17600  
|||||  
17394 TTGAAAGGAGCTTTCATGAACGATACAACAGAGCATCATGGACCTAATCCGCTAAACGCTCCACCACCTAGCAACTCACAGAGCAATGATCTTTTAAATTT 17493  
|||||  
17601 TTGAAAGGAGCTTTCATGAACGATACAACAGAGCATCATGGACCTAATCCGCTAAACGCTCCACCACCTAGCAACTCACAGAGCAATGATCTTTTAAATTT 17700  
|||||

17494 GCTAGACTCATTATATCCTAAAGGGAGTTAGGGGAGCAAAGATTTACGAGCTTTAAAGAATCAAGAAGAGTTGAAAAATATCCTAATAGAAATAGAA 17593  
|||||  
17701 GCTAGACTCATTATATCCTAAAGGGAGTTAGGGGAGCAAAGATTTACGAGCTTTAAAGAATCAAGAAGAGTTGAAAAATATCCTAATAGAAATAGAA 17800  
|||||  
17594 AAGCTACCGCAAGAAAAAGGTATGAACCTTCTGATGCAGATAGGACAAGCCAAGCAAAGAATAATGGAAGCATATGCTCATTCTTAGGATATATAG 17693  
|||||  
17801 AAGCTACCGCAAGAAAAAGGTATGAACCTTCTGATGCAGATAGGACAAGCCAAGCAAAGAATAATGGAAGCATATGCTCATTCTTAGGATATATAG 17900  
|||||  
17694 GGGGACTAGAGCATCTGTTAGGATTGTGTATGGTGGGATATTTGTTTTGTTTGCATCTATTTTGATTTTTAAGAACTAGCAAAAACATGGAGCTAGT 17793  
|||||  
17901 GGGGACTAGAGCATCTGTTAGGATTGTGTATGGTGGGATATTTGTTTTGTTTGCATCTATTTTGATTTTTAAGAACTAGCAAAAACATGGAGCTAGT 18000  
|||||  
17794 GGAAAGTCTAAAAACAAAACAAAACAAAACAAAACAAAACAAAACAAAACAAAACAAAACAAAACAAAACAAAACAAAACAAAACAAAACAAAACAAAAC 17893  
|||||  
18001 GGAAAGTCTAAAAACAAAACAAAACAAAACAAAACAAAACAAAACAAAACAAAACAAAACAAAACAAAACAAAACAAAACAAAACAAAACAAAACAAAAC 18100  
|||||  
17894 GAACGTATATATTAGGAATTGGTAGCACTAACGACAAGGTGCTCTTTGTTTTGAAAAACATTTGCTTCATAGGCATGGGCTATTTGATTTATAAAGTTA 17993  
|||||  
18101 GAACGTATATATTAGGAATTGGTAGCACTAACGACAAGGTGCTCTTTGTTTTGAAAAACATTTGCTTCATAGGCATGGGCTATTTGATTTATAAAGTTA 18200  
|||||  
17994 TTAAGGTTATTGGTATAAAAAATTTTATCAATGGTCTTTTCACTTCAAAGAAACAAGAGCAATAAGGAGAAACAATAATGAAAATGAGAGCAAGTGTTTT 18093  
|||||  
18201 TTAAGGTTATTGGTATAAAAAATTTTATCAATGGTCTTTTCACTTCAAAGAAACAAGAGCAATAAGGAGAAACAATAATGAAAATGAGAGCAAGTGTTTT 18300  
|||||  
18094 AATCGGTGCGACAATTTCTGTGCTTAAATTTTAAAGCGCATGCAGTAATTTATGCGAAAAAAGTGGTGAACAAGAAACCATGTTTATACGCTGTGTATAAT 18193  
|||||  
18301 AATCGGTGCGACAATTTCTGTGCTTAAATTTTAAAGCGCATGCAGTAATTTATGCGAAAAAAGTGGTGAACAAGAAACCATGTTTATACGCTGTGTATAAT 18400  
|||||  
18194 GAACGTAGAGAAGTATAGTGAATACCCCTTAAATGACAAAACAAAAGACACACCATTCATGGTGCAAGTGAAGTTGCCAAATACAGGATTTATTTGT 18293  
|||||  
18401 GAACGTAGAGAAGTATAGTGAATACCCCTTAAATGACAAAACAAAAGACACACCATTCATGGTGCAAGTGAAGTTGCCAAATACAGGATTTATTTGT 18500  
|||||  
18294 TGGATAATAAACAAGTTGTACTAATTTCAAACCTTGTTCACCATTCTAAAAAGATTACGCTCATAGGCATGCCAATAAGATCCTCCAATACAAGAATTA 18393  
|||||  
18501 TGGATAATAAACAAGTTGTACTAATTTCAAACCTTGTTCACCATTCTAAAAAGATTACGCTCATAGGCATGCCAATAAGATCCTCCAATACAAGAATTA 18600  
|||||  
18394 CTTCCAAGCTAACGGGGCAAGATCTGACATGATTTTTACTTGCACCACCTTTGAATCAAAGGGTGTGGTGTATGATAGCGAGTAACATAATGATAAT 18493  
|||||  
18601 CTTCCAAGCTAACGGGGCAAGATCTGACATGATTTTTACTTGCACCACCTTTGAATCAAAGGGTGTGGTGTATGATAGCGAGTAACATAATGATAAT 18700  
|||||  
18494 CCCAACACAAGAAAAACCAGACCTTTGATGTGTTGCAAGGAAGTCAGCCAATGCTAGGAGCTAACACAAAAAACCATGATGGCTATGATGTGAGTG 18593  
|||||  
18701 CCCAACACAAGAAAAACCAGACCTTTGATGTGTTGCAAGGAAGTCAGCCAATGCTAGGAGCTAACACAAAAAACCATGATGGCTATGATGTGAGTG 18800  
|||||  
18594 GAGCAAAACAAGCAAGTGAATCAATGAAGTGGCAAGGAAAAAGCTCAGCTAGAAAAAATCAATCAGTATTACAAGACTCTCTTGCAAGACAAGGAACA 18693  
|||||  
18801 GAGCAAAACAAGCAAGTGAATCAATGAAGTGGCAAGGAAAAAGCTCAGCTAGAAAAAATCAATCAGTATTACAAGACTCTCTTGCAAGACAAGGAACA 18900  
|||||  
18694 AGAATATACCCTAGGAAAAATAACCAACGAGAAATTTAGAAACATTGAGTAATCGTGCAGGTTATCAAATGAGGCAGAAATGTGATTAGTTCTGAGATT 18793  
|||||  
18901 AGAATATACCCTAGGAAAAATAACCAACGAGAAATTTAGAAACATTGAGTAATCGTGCAGGTTATCAAATGAGGCAGAAATGTGATTAGTTCTGAGATT 19000  
|||||  
18794 TTTAAGAATGGCAACTTGAACATGCAAGCCAAAGAAGAAGTGTAGGGAGAAGCTACAAGAAGAAAGAGAGAATGAATACTTGCAGCAATCAAATCAGAA 18893  
|||||  
19001 TTTAAGAATGGCAACTTGAACATGCAAGCCAAAGAAGAAGTGTAGGGAGAAGCTACAAGAAGAAAGAGAGAATGAATACTTGCAGCAATCAAATCAGAA 19100  
|||||  
18894 GTTTGCTCAGTGGTAAGTGAATGGAAGAAAAAGGGAGAGAGTATAAGGGTAGAGAACAACGCCAATAGGCGTTGGCCTTACTTGATAGGTAAGGCGATC 18993  
|||||  
19101 GTTTGCTCAGTGGTAAGTGAATGGAAGAAAAAGGGAGAGAGTATAAGGGTAGAGAACAACGCCAATAGGCGTTGGCCTTACTTGATAGGTAAGGCGATC 19200  
|||||  
18994 AAGTAGGTAATCTTTTAAAGCACTCATCATTTTTAATCTGTCTCTGCCAAGACAATACTTTTCAAACCTGAATTTTGTAGTTGCACCGAGATTTT 19093  
|||||  
19201 AAGTAGGTAATCTTTTAAAGCACTCATCATTTTTAATCTGTCTCTGCCAAGACAATACTTTTCAAACCTGAATTTTGTAGTTGCACCGAGATTTT 19300  
|||||  
19094 TTGTTCAATTTCCACATCAAGCGTTTTGCACTCCTTTTTCTTTTCATGTATTTTTCAAGATCAAATTTTCATCAGCAAAATCCCTAACATAGTCGTTATATTG 19193  
|||||  
19301 TTGTTCAATTTCCACATCAAGCGTTTTGCACTCCTTTTTCTTTTCATGTATTTTTCAAGATCAAATTTTCATCAGCAAAATCCCTAACATAGTCGTTATATTG 19400  
|||||  
19194 TTCAATGGTTTTTAGATTAGCATAGAAATTCACCTCTTTCATCTGTCTCACAACAATTTCAATAGTGGGAGCTTAGTGCCATACAATTTCTATTTGCGAG 19293  
|||||  
19401 TTCAATGGTTTTTAGATTAGCATAGAAATTCACCTCTTTCATCTGTCTCACAACAATTTCAATAGTGGGAGCTTAGTGCCATACAATTTCTATTTGCGAG 19500  
|||||  
19294 TCCATTTCTAATACTCATCTGAACATGACGGGCTTACTGAAGAAAGGCAGAAATATTCCAAGAATGATCGATCAAATTTGGAGAATAAGAAATTAG 19393  
|||||  
19501 TCCATTTCTAATACTCATCTGAACATGACGGGCTTACTGAAGAAAGGCAGAAATATTCCAAGAATGATCGATCAAATTTGGAGAATAAGAAATTAG 19600  
|||||  
19394 GATTCTTTGCAATCGCATGCAACAGTTCATAGTCTCATTCTCAAGCAAACGATAAACCTTTTTAAATTTATCAACACCAATGCTTTTGATAACAGCGCG 19493  
|||||  
19601 GATTCTTTGCAATCGCATGCAACAGTTCATAGTCTCATTCTCAAGCAAACGATAAACCTTTTTAAATTTATCAACACCAATGCTTTTGATAACAGCGCG 19700  
|||||



19494 ATAATCTTTCATGTAATTTCTTAGAACCTTATCTAACGCTCCCTTGTGTTGTATGCATCTGTTTGAAAAAATCATGCATGGTTTTTATTGATCCATGATT 19593  
|||||  
19701 ATAATCTTTCATGTAATTTCTTAGAACCTTATCTAACGCTCCCTTGTGTTGTATGCATCTGTTTGAAAAAATCATGCATGGTTTTTATTGATCCATGATT 19800  
|||||  
19594 TTCTTTTTTTCATCAGTGTTTAAAAGTTCGTTCTCCTGCAAACCTCAATAAGTTTTCTTTCTTATCTTTTGTAGTCAGCAATCATTGAGAAGAGTTTTC 19693  
|||||  
19801 TTCTTTTTTTCATCAGTGTTTAAAAGTTCGTTCTCCTGCAAACCTCAATAAGTTTTCTTTCTTATCTTTTGTAGTCAGCAATCATTGAGAAGAGTTTTC 19900  
|||||  
19694 GCATGTTATTACTCATATCGTTCTTGATCCCTTCAATGGATTGGTTTCTCTTTAGATTGTTCAAATCGTAAAGGTTTATATTGAAATTATACAATATCT 19793  
|||||  
19901 GCATGTTATTACTCATATCGTTCTTGATCCCTTCAATGGATTGGTTTCTCTTTAGATTGTTCAAATCGTAAAGGTTTATATTGAAATTATACAATATCT 20000  
|||||  
19794 GTTGTGTGAAAAATTCAGAGCGGTGATAATTCAAAGAGCAAGAAACTATTTTTTAAACCATAAAAATATTGCTTCAATCACTCTCATATCTATTTTTTCAA 19893  
|||||  
20001 GTTGTGTGAAAAATTCAGAGCGGTGATAATTCAAAGAGCAAGAAACTATTTTTTAAACCATAAAAATATTGCTTCAATCACTCTCATATCTATTTTTTCAA 20100  
|||||  
19894 ACCTACAAAAACGCTTTCACAAATAGCCCTAAAACCGATTAAAAGTTTTAATATATATATATTTTTTAAAAGCAAGATCAGTCGTAAAAATGCG 19993  
|||||  
20101 ACCTACAAAAACGCTTTCACAAATAGCCCTAAAACCGATTAAAAGTTTTAATATATATATATTTTTTAAAAGCAAGATCAGTCGTAAAAATGCG 20200  
|||||  
19994 TTACAACAAAAAAGGGTCAAGATAACTCAATTTTCAAAGAGGAGCTTAAGTAATAAAATCATAATGTTTCAGCTAGTAATCTATTGCTTTGTGATC 20093  
|||||  
20201 TTACAACAAAAAAGGGTCAAGATAACTCAATTTTCAAAGAGGAGCTTAAGTAATAAAATCATAATGTTTCAGCTAGTAATCTATTGCTTTGTGATC 20300  
|||||  
20094 AAACAAGCTCTGCGTGAAAGATGAAAAATTTTCACTTTAGATAGTTAATACACTACTAGAGTCTTACTTGTGGGACACTCATTTTATTAGTGGTTTTG 20193  
|||||  
20301 AAACAAGCTCTGCGTGAAAGATGAAAAATTTTCACTTTAGATAGTTAATACACTACTAGAGTCTTACTTGTGGGACACTCATTTTATTAGTGGTTTTG 20400  
|||||  
20194 TCTGATTTGTTGCTATCAAAACCATTACTAACCAAGCAGATCCCATGTTTTTGATACTATCGAATCCATTCTTCAGCACTTCTGCCATAAAATCTTGA 20293  
|||||  
20401 TCTGATTTGTTGCTATCAAAACCATTACTAACCAAGCAGATCCCATGTTTTTGATACTATCGAATCCATTCTTCAGCACTTCTGCCATAAAATCTTGA 20500  
|||||  
20294 TATTGTCCATAGGCAAGTTAAATTTTTCCCTAATGCTTCATTAAGTCCCATCATTAAACATCAGGAAGAACAAAAATTAATATCATAGAAAAACAATC 20393  
|||||  
20501 TATTGTCCATAGGCAAGTTAAATTTTTCCCTAATGCTTCATTAAGTCCCATCATTAAACATCAGGAAGAACAAAAATTAATATCATAGAAAAACAATC 20600  
|||||  
20394 ACTGGATAAACCTGTAAAAGATTTGTTCCGCCACCCAACAAGAGCTAAAATTTTTCCCATACTCAATCCTTTTATTTTTGGTTGTGTAAGTCTTTCG 20493  
|||||  
20601 ACTGGATAAACCTGTAAAAGATTTGTTCCGCCACCCAACAAGAGCTAAAATTTTTCCCATACTCAATCCTTTTATTTTTGGTTGTGTAAGTCTTTCG 20700  
|||||  
20494 TGTTCCGGATCTCTAATGCGTGTTTTAGTAGGAAGCATTTCACAATAGCATACTAAAGCTACTAACAAAAATCTTGAATCTATTGGTAAGATTACTCAT 20593  
|||||  
20701 TGTTCCGGATCTCTAATGCGTGTTTTAGTAGGAAGCATTTCACAATAGCATACTAAAGCTACTAACAAAAATCTTGAATCTATTGGTAAGATTACTCAT 20800  
|||||  
20594 GAAATCAAGCGATAAGTAACCAACCAATCGCAACAAATCAAATATTTTGCCACCAACAAGCCATATCCTTTTGTGTTTTATCTCCTAATTATAGCAAT 20693  
|||||  
20801 GAAATCAAGCGATAAGTAACCAACCAATCGCAACAAATCAAATATTTTGCCACCAACAAGCCATATCCTTTTGTGTTTTATCTCCTAATTATAGCAAT 20900  
|||||  
20694 TTTTCTCAATATTAATTTGAAAAACCACCACCATATCAAAAACAAATTAAGTAGCACACTAGATGCAGAAATATTTTTAAAAAACGCTCCTTTAAATTTAA 20793  
|||||  
20901 TTTTCTCAATATTAATTTGAAAAACCACCACCATATCAAAAACAAATTAAGTAGCACACTAGATGCAGAAATATTTTTAAAAAACGCTCCTTTAAATTTAA 21000  
|||||  
20794 AATCATGGGTTTTTAGGATTTGAATACCAAAAATCGATTGGTTTTTTCAAATAAGCTAGCTTTGGGTATGCACCTTAAAAAGATTTTAGTTTTAGCCAGT 20893  
|||||  
21001 AATCATGGGTTTTTAGGATTTGAATACCAAAAATCGATTGGTTTTTTCAAATAAGCTAGCTTTGGGTATGCACCTTAAAAAGATTTTAGTTTTAGCCAGT 21100  
|||||  
20894 AAGGTTTTATGCTAATGTTTGAAAAAAGAAATTTCTCTAATCAAGTCTTGAGAAATTTTGAGCAATCATAAGAACCATTTTGCCATTGAGTCAT 20993  
|||||  
21101 AAGGTTTTATGCTAATGTTTGAAAAAAGAAATTTCTCTAATCAAGTCTTGAGAAATTTTGAGCAATCATAAGAACCATTTTGCCATTGAGTCAT 21200  
|||||  
20994 AAGTATGATTAGCTTCATTGTGAATTTGCGTGGCTTAAGAGATAGTATTGCTTATTATGCTGAGAGAAACGAGTAGCAAAGATAAGTAGTGTAAATA 21093  
|||||  
21201 AAGTATGATTAGCTTCATTGTGAATTTGCGTGGCTTAAGAGATAGTATTGCTTATTATGCTGAGAGAAACGAGTAGCAAAGATAAGTAGTGTAAATA 21300  
|||||  
21094 AAAAAGCTAGGTTTTATTATAAGAGCGAATAAGAATAATTTGGATAAACTAAAATCACCCCTGCCGCATAAGAAAAAGCGCTATTAAAAAACCTATAA 21193  
|||||  
21301 AAAAAGCTAGGTTTTATTATAAGAGCGAATAAGAATAATTTGGATAAACTAAAATCACCCCTGCCGCATAAGAAAAAGCGCTATTAAAAAACCTATAA 21400  
|||||  
21194 CGATAGAGCTGATATTGAACGCCTATAATAAAGGCTGTACTTATCTAAATGTTGTTGAAAGAATGTTGAATTGTAAGAAGTTTTGTTTTAATTTGCT 21293  
|||||  
21401 CGATAGAGCTGATATTGAACGCCTATAATAAAGGCTGTACTTATCTAAATGTTGTTGAAAGAATGTTGAATTGTAAGAAGTTTTGTTTTAATTTGCT 21500  
|||||  
21294 AATTCTGTTGTTCCATTTGGTTTTTAAAGAAATAGTTTCAGGGCGGTGAACCTATAAAGGAGCATAAAAATAAATAATTTTTAAAAAACCCCTAATCT 21393  
|||||  
21501 AATTCTGTTGTTCCATTTGGTTTTTAAAGAAATAGTTTCAGGGCGGTGAACCTATAAAGGAGCATAAAAATAAATAATTTTTAAAAAACCCCTAATCT 21600  
|||||  
21394 AATTCCAAATCTCAAAGAATACCCCACTGCTGATACTAGCATGTGGTATAGCACAAACCAACGATTTGTTGTTTATGCCAAACAAAAACAGAAAACAT 21493  
|||||  
21601 AATTCCAAATCTCAAAGAATACCCCACTGCTGATACTAGCATGTGGTATAGCACAAACCAACGATTTGTTGTTTATGCCAAACAAAAACAGAAAACAT 21700  
|||||

21494 CTGTTAAAGAATAAAGGAGT... 21593  
21701 CTGTTAAAGAATAAAGGAGT... 21800  
21594 CAAGAAAAACATAACACT... 21693  
21801 CAAGAAAAACATAACACT... 21900  
21694 ATATTTTTTGAATTTAAGG... 21793  
21901 ATATTTTTTGAATTTAAGG... 22000  
21794 CAGTTTGGTTTCATTTTCA... 21893  
22001 CAGTTTGGTTTCATTTTCA... 22100  
21894 ATGATTTCTTAGAAGACT... 21993  
22101 ATGATTTCTTAGAAGACT... 22200  
21994 AGAAAAAGAGGCTCTAG... 22093  
22201 AGAAAAAGAGGCTCTAG... 22300  
22094 TATAGGAAACTTCTTCCT... 22193  
22301 TATAGGAAACTTCTTCCT... 22400  
22194 AAACGAGCAGTATTTTAA... 22293  
22401 AAACGAGCAGTATTTTAA... 22500  
22294 AAAAGCAGCCGATTAGCT... 22393  
22501 AAAAGCAGCCGATTAGCT... 22600  
22394 TATTACTTACAGCTTGA... 22493  
22601 TATTACTTACAGCTTGA... 22700  
22494 TTAGCATGGCGATTGATA... 22593  
22701 TTAGCATGGCGATTGATA... 22800  
22594 TCTGACTAAAAATTTTAC... 22693  
22801 TCTGACTAAAAATTTTAC... 22900  
22694 AAATCTATATTA AAAAG... 22793  
22901 AAATCTATATTA AAAAG... 23000  
22794 TTAATTTCTTCAAAACAG... 22893  
23001 TTAATTTCTTCAAAACAG... 23100  
22894 AAAC TAGGTTCTGTCGCT... 22993  
23101 AAAC TAGGTTCTGTCGCT... 23200  
22994 TAGGCTTTAAAAAATCAA... 23093  
23201 TAGGCTTTAAAAAATCAA... 23300  
23094 ACGAAATGATAGGGCGAG... 23193  
23301 ACGAAATGATAGGGCGAG... 23400  
23194 GGGATTGCAAGAATTAAC... 23293  
23401 GGGATTGCAAGAATTAAC... 23500  
23294 ATGAGATGATTAATAAG... 23393  
23501 ATGAGATGATTAATAAG... 23600  
23394 GTGTATTATTCAAGCAAC... 23493  
23601 GTGTATTATTCAAGCAAC... 23700

23494 GAAATAGAGACAGAAAAAACAAGTTTTCTAGACAACACTTGAGTGGTTTAAAACCTCGCTCTTAATAACAGCAACAATAGAACCTTTCTTATAGCTTCGT 23593  
|||||  
23701 GAAATAGAGACAGAAAAAACAAGTTTTCTAGACAACACTTGAGTGGTTTAAAACCTCGCTCTTAATAACAGCAACAATAGAACCTTTCTTATAGCTTCGT 23800  
|||||  
23594 GCGCTATTTGTGAGAAGAGAAAAAAGAAATGGAGCAAGAAAAAATACTACCAAGATACTACAAATACAAGTGAAGTTGGGGCTACTGATACAAAAGAAAA 23693  
|||||  
23801 GCGCTATTTGTGAGAAGAGAAAAAAGAAATGGAGCAAGAAAAAATACTACCAAGATACTACAAATACAAGTGAAGTTGGGGCTACTGATACAAAAGAAAA 23900  
|||||  
23694 CGAAGCAAAAGATGCAACATTCTCAAACAATCACTCTAAATCTGAAGTCCCAATAGCGTCATTAATCAAATAGAACAAAGCATCGCTCATGAAAAAAA 23793  
|||||  
23901 CGAAGCAAAAGATGCAACATTCTCAAACAATCACTCTAAATCTGAAGTCCCAATAGCGTCATTAATCAAATAGAACAAAGCATCGCTCATGAAAAAAA 24000  
|||||  
23794 TAGCGATCCAAATTATTAGCTCAAAAAACAATAGAGAAAACAAATCCCAAAGGTTAGAAATCATAGCTTGTCTGCTCTCAGAAAAATCATTGACAATGATC 23893  
|||||  
24001 TAGCGATCCAAATTATTAGCTCAAAAAACAATAGAGAAAACAAATCCCAAAGGTTAGAAATCATAGCTTGTCTGCTCTCAGAAAAATCATTGACAATGATC 24100  
|||||  
23894 TTACTTGATTGCCTTTCTGTAGGTATTGCGCTTACTTTGTTCTAGGGATCTTTCTAATGCGTCCAACCTTCTCTAAATAATTTAAAAAGACCTTGTGT 23993  
|||||  
24101 TTACTTGATTGCCTTTCTGTAGGTATTGCGCTTACTTTGTTCTAGGGATCTTTCTAATGCGTCCAACCTTCTCTAAATAATTTAAAAAGACCTTGTGT 24200  
|||||  
23994 GAGCTAACATAAGCTTTCTGATTCTCTTTGATGAAATTTTTATTTTTTAGGCTTTCTACAAGCGTCTGTGAAGCAGTGATTAAGGAAGCTGTACCTCCAAT 24093  
|||||  
24201 GAGCTAACATAAGCTTTCTGATTCTCTTTGATGAAATTTTTATTTTTTAGGCTTTCTACAAGCGTCTGTGAAGCAGTGATTAAGGAAGCTGTACCTCCAAT 24300  
|||||  
24094 GTTGCTCTGATATGTCTTTAGAGAAGTTTCTAAACGCTCTCTTATATTTTGTTTTTCTTGCTCGATCTTCAGCTTCCCTCACAATAAAGAACTAAAAC 24193  
|||||  
24301 GTTGCTCTGATATGTCTTTAGAGAAGTTTCTAAACGCTCTCTTATATTTTGTTTTTCTTGCTCGATCTTCAGCTTCCCTCACAATAAAGAACTAAAAC 24400  
|||||  
24194 TTATCGGATATTCGCCATTGTGTCTCAGCAGTCTTTTGGTCTAAGGGATTGATTTTCATATAGGTTAATAAAGTTTCAAGGCTAGACATATAAGTCTTAA 24293  
|||||  
24401 TTATCGGATATTCGCCATTGTGTCTCAGCAGTCTTTTGGTCTAAGGGATTGATTTTCATATAGGTTAATAAAGTTTCAAGGCTAGACATATAAGTCTTAA 24500  
|||||  
24294 AAATCACATCTTCTGAGATGAAAAATAACTCATTGCTTCAAAATTTGGCTTTCAATAACGCTAAATCTCCTCTCAAAGCAATGGCCGCTTTTTTGATGTT 24393  
|||||  
24501 AAATCACATCTTCTGAGATGAAAAATAACTCATTGCTTCAAAATTTGGCTTTCAATAACGCTAAATCTCCTCTCAAAGCAATGGCCGCTTTTTTGATGTT 24600  
|||||  
24394 TAGAGCATCTTCTTGACCTATTTTATTATTAGCGTAGGGCTAGTGGTTGAAAAAATCTCATCTAGGTTTTTGAGCACTTGTGGTGGTCTCTTGGTAG 24493  
|||||  
24601 TAGAGCATCTTCTTGACCTATTTTATTATTAGCGTAGGGCTAGTGGTTGAAAAAATCTCATCTAGGTTTTTGAGCACTTGTGGTGGTCTCTTGGTAG 24700  
|||||  
24494 GTGTTATCAAGTTGCTTTAAGCCGCTTGTATATCTTCTGCCATCAAAACAGACAAGAGCAAAAAAAGAGATATGGTATTTTTACGAGTGTTCATTT 24593  
|||||  
24701 GTGTTATCAAGTTGCTTTAAGCCGCTTGTATATCTTCTGCCATCAAAACAGACAAGAGCAAAAAAAGAGATATGGTATTTTTACGAGTGTTCATTT 24800  
|||||  
24594 GACAATAACTTTAGAGTAGCAATGTTTCTTGCTGCTTTCTCTTTCTAATTTCAAGTGTCTTCCCAAAGGTCGGCTTTTTTTTTCAAGATTCTCTATA 24693  
|||||  
24801 GACAATAACTTTAGAGTAGCAATGTTTCTTGCTGCTTTCTCTTTCTAATTTCAAGTGTCTTCCCAAAGGTCGGCTTTTTTTTTCAAGATTCTCTATA 24900  
|||||  
24694 TAGTTTAAATGATTTTCTGCGTTTAAAGATAGCAACTTCTATGAGCGCGTTCAAATCTACTGATCCTTTTAAAGTTTTGATTTCTCCATTGATCCCATTC 24793  
|||||  
24901 TAGTTTAAATGATTTTCTGCGTTTAAAGATAGCAACTTCTATGAGCGCGTTCAAATCTACTGATCCTTTTAAAGTTTTGATTTCTCCATTGATCCCATTC 25000  
|||||  
24794 AATAAGCGATATTTTTGAAAACTGTCATCACTCAGTTTATTTTGAATAAGGGCTACAATCATCTGTAATCTGAATAACCTGTTCCATAAGGCATGCTGA 24893  
|||||  
25001 AATAAGCGATATTTTTGAAAACTGTCATCACTCAGTTTATTTTGAATAAGGGCTACAATCATCTGTAATCTGAATAACCTGTTCCATAAGGCATGCTGA 25100  
|||||  
24894 AATTTTTAGCCCATCAAGATAGGGGCATTTTGTGGTACTAGAGTAAATGTTTCAATGATTTCCAAATGGTGACCCATGCTTGAAAAAAACTAAGAGCA 24993  
|||||  
25101 AATTTTTAGCCCATCAAGATAGGGGCATTTTGTGGTACTAGAGTAAATGTTTCAATGATTTCCAAATGGTGACCCATGCTTGAAAAAAACTAAGAGCA 25200  
|||||  
24994 GGCGCATAGATGGCACTTTGAAACAAAGCCTGACCCGTTAGGGAATTATAATCAATAAGGGTCGCTTTTGCATAGCCACTTTCACCATGTTTCAAAC 25093  
|||||  
25201 GGCGCATAGATGGCACTTTGAAACAAAGCCTGACCCGTTAGGGAATTATAATCAATAAGGGTCGCTTTTGCATAGCCACTTTCACCATGTTTCAAAC 25300  
|||||  
25094 CTTTTAAGGTTTCTTCAAACGCTTGATACCAATCGTATTGTAAGCGATGTATTGAGCGTTGTGAGAAGAACTTCTTAGAGCTTGAGAAAGCATTTCCAT 25193  
|||||  
25301 CTTTTAAGGTTTCTTCAAACGCTTGATACCAATCGTATTGTAAGCGATGTATTGAGCGTTGTGAGAAGAACTTCTTAGAGCTTGAGAAAGCATTTCCAT 25400  
|||||  
25194 TTGTGTTTTTAGAGTAACGCTCGGTTCAAAGCTATTTTTTAAACGCTTCTAAGAGAGCGTTTTGCTGGTTCATTTTGGCTTGATTATTTTCGTTATTTTT 25293  
|||||  
25401 TTGTGTTTTTAGAGTAACGCTCGGTTCAAAGCTATTTTTTAAACGCTTCTAAGAGAGCGTTTTGCTGGTTCATTTTGGCTTGATTATTTTCGTTATTTTT 25500  
|||||  
25294 TGGAGCGGATTTGCATGTTTTGGATTTCTGTTGGGTATTAATTTTTGTTTTTCCAGATCATTTTGACATTTCCCCCAATGCGCTAAGCGCGCTTG 25393  
|||||  
25501 TGGAGCGGATTTGCATGTTTTGGATTTCTGTTGGGTATTAATTTTTGTTTTTCCAGATCATTTTGACATTTCCCCCAATGCGCTAAGCGCGCTTG 25600  
|||||  
25394 AATACCTTCCATGACGCCAAGCAAGATGTCTGAACCTGCAAAAAACCCCTGTGATGCCATTGACGCCATTAATAACGCCATTAGCCCTTTTAAACAT 25493  
|||||  
25601 AATACCTTCCATGACGCCAAGCAAGATGTCTGAACCTGCAAAAAACCCCTGTGATGCCATTGACGCCATTAATAACGCCATTAGCCCTTTTAAACAT 25700  
|||||

25494 AGCGCTCATGGTTGCAAGCTGGGTTCTCAATTCCTCCTCTATTTGCGCTTGAATGGCTTTTCTTTGGCACCTAGACTGAGCTTCTATGGCTTTTAATTCA 25593  
|||||  
25701 AGCGCTCATGGTTGCAAGCTGGGTTCTCAATTCCTCCTCTATTTGCGCTTGAATGGCTTTTCTTTGGCACCTAGACTGAGCTTCTATGGCTTTTAATTCA 25800  
|||||  
25594 GCTTGAGCGGTTTTTTGTTGGCTTGTGCGTCCGCCTGAATGGCTTTTAAGCGGGTTCAAGCGTTATTACTACTTCTGTGCCATTTCAGAGACAAACCAC 25693  
|||||  
25801 GCTTGAGCGGTTTTTTGTTGGCTTGTGCGTCCGCCTGAATGGCTTTTAAGCGGGTTCAAGCGTTATTACTACTTCTGTGCCATTTCAGAGACAAACCAC 25900  
|||||  
25694 AAAAAAGTCAAGAAAGAAAATATGCTTAAAAACATTTACATCTCTTTCCCTCACTTCACGATTATTTTAGTTTGCACCCCTTCTGTTAAGTAGCTATCTT 25793  
|||||  
25901 AAAAAAGTCAAGAAAGAAAATATGCTTAAAAACATTTACATCTCTTTCCCTCACTTCACGATTATTTTAGTTTGCACCCCTTCTGTTAAGTAGCTATCTT 26000  
|||||  
25794 TTTGCCCTTAAGCTTGTCTTTGATGTAATCAAGGTAAGTCAAATGCGATTTCAAAAAAGATTATTCGCTACTATATGTAATTATATAGCGAGCTTAT 25893  
|||||  
26001 TTTGCCCTTAAGCTTGTCTTTGATGTAATCAAGGTAAGTCAAATGCGATTTCAAAAAAGATTATTCGCTACTATATGTAATTATATAGCGAGCTTAT 26100  
|||||  
25894 GTTAGAAATCGCTTGAAGTGCATAGGTGCTAGTAGCCAATCCTGATTGATTAAGTATCATTTGAGAAGCGTTCTGCAACAAATTGGTATTGTTTTTCA 25993  
|||||  
26101 GTTAGAAATCGCTTGAAGTGCATAGGTGCTAGTAGCCAATCCTGATTGATTAAGTATCATTTGAGAAGCGTTCTGCAACAAATTGGTATTGTTTTTCA 26200  
|||||  
25994 AATTCTATATAGTATTCTCTCAAAATTTCTGTACTTTTTTCAGCATAGCAATAAACGGCAAGAACCCTTGTCCTCAATAGGGCATGCAGGGGTGGTCATAG 26093  
|||||  
26201 AATTCTATATAGTATTCTCTCAAAATTTCTGTACTTTTTTCAGCATAGCAATAAACGGCAAGAACCCTTGTCCTCAATAGGGCATGCAGGGGTGGTCATAG 26300  
|||||  
26094 GATTAACGCCTGAAGTTAGGGCATTAGTGGCTAACGCCTTGGTATTTGGCATAAACAGTGGGCATAGAAACACTCATGGCGCTCATAGAAATTTGCATGCA 26193  
|||||  
26301 GATTAACGCCTGAAGTTAGGGCATTAGTGGCTAACGCCTTGGTATTTGGCATAAACAGTGGGCATAGAAACACTCATGGCGCTCATAGAAATTTGCATGCA 26400  
|||||  
26194 ACTAAAAACACTTTTGTAGAGCCAACAAGTGCACCTAAAGCGGTGCAGCTATCAAGGGAATCGGCTGTATCATTATTGAGCTGTGCTTGGCTTGGAGAA 26293  
|||||  
26401 ACTAAAAACACTTTTGTAGAGCCAACAAGTGCACCTAAAGCGGTGCAGCTATCAAGGGAATCGGCTGTATCATTATTGAGCTGTGCTTGGCTTGGAGAA 26500  
|||||  
26294 CGCAGTTGCTCTTGTAGAGCTAGGGCGTATTTTGGTGTGCACTTGTAAATTTGCCTAAGATACCGCTCATATTCAACCGTTGTTGGTACACTAGGAA 26393  
|||||  
26501 CGCAGTTGCTCTTGTAGAGCTAGGGCGTATTTTGGTGTGCACTTGTAAATTTGCCTAAGATACCGCTCATATTCAACCGTTGTTGGTACACTAGGAA 26600  
|||||  
26394 CAGCGATTTGATTTCGTCGCATAAGCCTCAATAGCGCTGGGATTTTTAGGGGTGGTGTACTCGCTAAAAATGCTTGCAATCTGACTATTAACAGCACTAAT 26493  
|||||  
26601 CAGCGATTTGATTTCGTCGCATAAGCCTCAATAGCGCTGGGATTTTTAGGGGTGGTGTACTCGCTAAAAATGCTTGCAATCTGACTATTAACAGCACTAAT 26700  
|||||  
26494 TTGCGCGCCTTGCGTGTTCCTTGTGCGTTAAATTCCTGTTAAATTTGCTGATATTTAAGATATTGTTCCCCACAGCCATGCTTTGATCGTTAAAAACCC 26593  
|||||  
26701 TTGCGCGCCTTGCGTGTTCCTTGTGCGTTAAATTCCTGTTAAATTTGCTGATATTTAAGATATTGTTCCCCACAGCCATGCTTTGATCGTTAAAAACCC 26800  
|||||  
26594 TGATACAATTTGGTTGATTTGTTGGTTAGCGGCTTTTCATAGGCATGCTTACGGCTTCAGCGATGCTCTGATTGTATTGGGTGATGATAGCGGTCATTTGCG 26693  
|||||  
26801 TGATACAATTTGGTTGATTTGTTGGTTAGCGGCTTTTCATAGGCATGCTTACGGCTTCAGCGATGCTCTGATTGTATTGGGTGATGATAGCGGTCATTTGCG 26900  
|||||  
26694 GATTAGTAAATCCCACAACAATAGGAATAATCGCTGCTGACATAGCACCCGCTACTATTCTGCAAAATGGCCCTGCAACACTACTTGTGCTTGGATGAT 26793  
|||||  
26901 GATTAGTAAATCCCACAACAATAGGAATAATCGCTGCTGACATAGCACCCGCTACTATTCTGCAAAATGGCCCTGCAACACTACTTGTGCTTGGATGAT 27000  
|||||  
26794 TGAGGAAATTTCCGATAAGAAGCCTGCAGAAGATGATTCATATATAGCTTGTGTACCTGCCATGTTAATACCTCCTAATGGTGGTAAAAACGATGAATC 26893  
|||||  
27001 TGAGGAAATTTCCGATAAGAAGCCTGCAGAAGATGATTCATATATAGCTTGTGTACCTGCCATGTTAATACCTCCTAATGGTGGTAAAAACGATGAATC 27100  
|||||  
26894 TGAGTATGTTGGTGCATAACCATAACATGAAAGGATTTGTTGGACCGTAATCGCCCATCATTTGGCTCATGAGAAGATTTGAATGCCCCACATCGCATTTG 26993  
|||||  
27101 TGAGTATGTTGGTGCATAACCATAACATGAAAGGATTTGTTGGACCGTAATCGCCCATCATTTGGCTCATGAGAAGATTTGAATGCCCCACATCGCATTTG 27200  
|||||  
26994 ATACCTAGATTATCATTAGGTTGAAAACCTCCCTAACTTATGTGCTCAAATTTGATATTAACATTTCTTATCATTATAGTCATTGAGTATGGCCACTTTTT 27093  
|||||  
27201 ATACCTAGATTATCATTAGGTTGAAAACCTCCCTAACTTATGTGCTCAAATTTGATATTAACATTTCTTATCATTATAGTCATTGAGTATGGCCACTTTTT 27300  
|||||  
27094 GCTCTAGGGTTTCTTTAGGGATCTCTATTTTTAGTTGATCTCTAGAAACAAGCCCCACGCTATTTAGTGCCATATCTTCAGGACTAATATCTTTTATATC 27193  
|||||  
27301 GCTCTAGGGTTTCTTTAGGGATCTCTATTTTTAGTTGATCTCTAGAAACAAGCCCCACGCTATTTAGTGCCATATCTTCAGGACTAATATCTTTTATATC 27400  
|||||  
27194 AGTGTTTTGGTCAGCGTTAAGCGGAGCGTTAAACATGCCAATGATAAAGACCAAGCAAAATAGTAATTTAATTTTATAAAAATTCGTTTTTCATACCTTTT 27293  
|||||  
27401 AGTGTTTTGGTCAGCGTTAAGCGGAGCGTTAAACATGCCAATGATAAAGACCAAGCAAAATAGTAATTTAATTTTATAAAAATTCGTTTTTCATACCTTTT 27500  
|||||  
27294 ACTCCTTTATTCTTATTTTATAGCATTATCTAGCGCATTAACACCACTCAATCGCTGTTTTGTTTTGATTTTCTTGATCGAGCATTGTTTTGTTACTT 27393  
|||||  
27501 ACTCCTTTATTCTTATTTTATAGCATTATCTAGCGCATTAACACCACTCAATCGCTGTTTTGTTTTGATTTTCTTGATCGAGCATTGTTTTGTTACTT 27600  
|||||  
27394 CATCAATGTTTTGAAAATATTTTTCAAAAAGCTCTTCTTTTTAGCTTCAACGCTCATATCAACCTGAATCCAATTAGGAACAATGGAGTCCATGATTA 27493  
|||||  
27601 CATCAATGTTTTGAAAATATTTTTCAAAAAGCTCTTCTTTTTAGCTTCAACGCTCATATCAACCTGAATCCAATTAGGAACAATGGAGTCCATGATTA 27700  
|||||

27494 ATGCATGAAGTCATAGGCATGATTGGTTGGGTATATTTGTTCTGAACATAGTATCTAAAAAATTCGCTTGAACAAAAAATTTCTCTATATCGCTCTGC 27593  
|||||  
27701 ATGCATGAAGTCATAGGCATGATTGGTTGGGTATATTTGTTCTGAACATAGTATCTAAAAAATTCGCTTGAACAAAAAATTTCTCTATATCGCTCTGC 27800  
|||||  
27594 ATATCCTCGCTTATGTTGTTATTGATAGGTTTTCTAGTAATCTGAGAATCCTATACGACTGCATGATAGTTTCTAGCATGAAGTAAGCATAAACATAAA 27693  
|||||  
27801 ATATCCTCGCTTATGTTGTTATTGATAGGTTTTCTAGTAATCTGAGAATCCTATACGACTGCATGATAGTTTCTAGCATGAAGTAAGCATAAACATAAA 27900  
|||||  
27694 CTAATGAGACAAAAGAATTATTGGCTTTAAACGAGTTTGCATCATTTTTCCCACTTTGAAGAGAAATTAATCTTGATAATGTTTTTTGGGGATCTTGCCC 27793  
|||||  
27901 CTAATGAGACAAAAGAATTATTGGCTTTAAACGAGTTTGCATCATTTTTCCCACTTTGAAGAGAAATTAATCTTGATAATGTTTTTTGGGGATCTTGCCC 28000  
|||||  
27794 TTCGTTTATTTCTTTAAAAAGCGGAAATCTAAATCCTGATTACTGAGAAATGACTTGACAAAGTGAAGATTAGCATTGAGACTATCTATGAGACCTGAA 27893  
|||||  
28001 TTCGTTTATTTCTTTAAAAAGCGGAAATCTAAATCCTGATTACTGAGAAATGACTTGACAAAGTGAAGATTAGCATTGAGACTATCTATGAGACCTGAA 28100  
|||||  
27894 TAAAGATGCTCTGTTTGGACATCATCTATATTTAAACATTTCTCATAAAACATTTGACATGGTCTTCTAAGAAATTAGAAAAATCATAAAGAGTGGTAA 27993  
|||||  
28101 TAAAGATGCTCTGTTTGGACATCATCTATATTTAAACATTTCTCATAAAACATTTGACATGGTCTTCTAAGAAATTAGAAAAATCATAAAGAGTGGTAA 28200  
|||||  
27994 GGTTTTGTTCGGTGATTTTACCTTCCATTTCTTCTCTATGAAGTCCAACCTCTTCTTTCAGTTCAAAAAGATAATTAGAAAAATCCTCAAAATCGTCAA 28093  
|||||  
28201 GGTTTTGTTCGGTGATTTTACCTTCCATTTCTTCTCTATGAAGTCCAACCTCTTCTTTCAGTTCAAAAAGATAATTAGAAAAATCCTCAAAATCGTCAA 28300  
|||||  
28094 GACATCATTTTCTAAAAATTTTCAATAATTTTGTTCACGCAAAATTTGTTTCATTTTAATACTCCTCTATTGTTGATACATTTGCCTCAAGGCCTGATA 28193  
|||||  
28301 GACATCATTTTCTAAAAATTTTCAATAATTTTGTTCACGCAAAATTTGTTTCATTTTAATACTCCTCTATTGTTGATACATTTGCCTCAAGGCCTGATA 28400  
|||||  
28194 TTTATCTATGATACTATGGTTTGGATAATCTTGCAATTTCTTTGACAAATACAGTACTCTGTGGATAAAAAATTTCAAATATTCTTTAGGAATGCCTCTC 28293  
|||||  
28401 TTTATCTATGATACTATGGTTTGGATAATCTTGCAATTTCTTTGACAAATACAGTACTCTGTGGATAAAAAATTTCAAATATTCTTTAGGAATGCCTCTC 28500  
|||||  
28294 AAATTAATACTAGCGATAACGCTAGGGCTCCATCTGTTTGTAGAGAAATTTCCCTGTCTAGTCCCTTAGTGATGATTTCAAATCTTTTCTGTAAACAT 28393  
|||||  
28501 AAATTAATACTAGCGATAACGCTAGGGCTCCATCTGTTTGTAGAGAAATTTCCCTGTCTAGTCCCTTAGTGATGATTTCAAATCTTTTCTGTAAACAT 28600  
|||||  
28394 TAGCTAATCTTTGGTAAATCAGAAAGATTGCCCCATCGTTTCTCAAAAAATCTTTGTAGGGCATTGTTCTCTAATCGTATCAGCAATAGGGCAAGCCAA 28493  
|||||  
28601 TAGCTAATCTTTGGTAAATCAGAAAGATTGCCCCATCGTTTCTCAAAAAATCTTTGTAGGGCATTGTTCTCTAATCGTATCAGCAATAGGGCAAGCCAA 28700  
|||||  
28494 AAGATCAGTGATGCTTTGAGTCGCAAGTCTGACAATAGCGTTTCTTTTCTTGCAGTTTTTAGCATGTCTCTCACAAAAAATAGCGACCTTTGGATCGCCT 28593  
|||||  
28701 AAGATCAGTGATGCTTTGAGTCGCAAGTCTGACAATAGCGTTTCTTTTCTTGCAGTTTTTAGCATGTCTCTCACAAAAAATAGCGACCTTTGGATCGCCT 28800  
|||||  
28594 AAATATTTCCAAGCTTCATCAATATCTAAGACAAATCTACGCCATCCATTGCCTCTTTGGATACGAGCGAAAAGGTAAAAACAAATAAAGGGCGAAACAT 28693  
|||||  
28801 AAATATTTCCAAGCTTCATCAATATCTAAGACAAATCTACGCCATCCATTGCCTCTTTGGATACGAGCGAAAAGGTAAAAACAAATAAAGGGCGAAACAT 28900  
|||||  
28694 CATTATTGTCTAAGAAACTTGACCCATCAACGCCAATAATCGTTTTTGA AAAATCTAAGCGATCCGTTGCTTTATTATCAAAAAGCCATTGAAATTCACC 28793  
|||||  
28901 CATTATTGTCTAAGAAACTTGACCCATCAACGCCAATAATCGTTTTTGA AAAATCTAAGCGATCCGTTGCTTTATTATCAAAAAGCCATTGAAATTCACC 29000  
|||||  
28794 ATTGGTTGATTTGCAAAAAGGTGCTAATCGCGGACAAGCCATTAGGATCATTTGGTCTTTCCCGAAAGCATTAATAAGTTGAGTGATGGGATAATCT 28893  
|||||  
29001 ATTGGTTGATTTGCAAAAAGGTGCTAATCGCGGACAAGCCATTAGGATCATTTGGTCTTTCCCGAAAGCATTAATAAGTTGAGTGATGGGATAATCT 29100  
|||||  
28894 AGGTTTCATATCTCCTGTGATAAGGTTGGTTACTGCCGTGCAAGCGTATTAGAATCTGCTAGGCTAAAAGAGATGCTGTTGCCATTTTCATCTTTTCAT 28993  
|||||  
29101 AGGTTTCATATCTCCTGTGATAAGGTTGGTTACTGCCGTGCAAGCGTATTAGAATCTGCTAGGCTAAAAGAGATGCTGTTGCCATTTTCATCTTTTCAT 29200  
|||||  
28994 CGCTTTGGTTGCTAAGTTTTTCAAGCTCTTTGACAACAGAAATAGCCGTTTGTTTTTGCTCCATTGTTGCATTTGTTTTTGCACACAAGCTGCCCA 29093  
|||||  
29201 CGCTTTGGTTGCTAAGTTTTTCAAGCTCTTTGACAACAGAAATAGCCGTTTGTTTTTGCTCCATTGTTGCATTTGTTTTTGCACACAAGCTGCCCA 29300  
|||||  
29094 AGCAAAAAGGATTTAATCCTGTATCTGTCCCTAGCTCAATTTTGACATACTCCCCACCCATTGCGACAATATCCCATAAAGCGCCATAATCTTTATCCATA 29193  
|||||  
29301 AGCAAAAAGGATTTAATCCTGTATCTGTCCCTAGCTCAATTTTGACATACTCCCCACCCATTGCGACAATATCCCATAAAGCGCCATAATCTTTATCCATA 29400  
|||||  
29194 TAGACCATAGTGAGCTTTTGCTTGTCTTTGCTGACATTAGCAGGAAAATTTGGAACAAATTTGCCCATAGCGTTCAAGGTCAATTGACATAAACTGTCT 29293  
|||||  
29401 TAGACCATAGTGAGCTTTTGCTTGTCTTTGCTGACATTAGCAGGAAAATTTGGAACAAATTTGCCCATAGCGTTCAAGGTCAATTGACATAAACTGTCT 29500  
|||||  
29294 TACCTGAACCGGTTGATCCAAGTATCAAAGTGTCTCTGCTGAAGCTGAACCAAATCAGTGGGATGTGGAAGTTGAGATAAAAAGGCGAATTGATCTC 29393  
|||||  
29501 TACCTGAACCGGTTGATCCAAGTATCAAAGTGTCTCTGCTGAAGCTGAACCAAATCAGTGGGATGTGGAAGTTGAGATAAAAAGGCGAATTGATCTC 29600  
|||||  
29394 GCTTTTTAGTGTCATGACGCTATTGCCCAAGCGTTATTTCTCTGATTGCCATCAAAGCTCATAGCCCTCATCGCAATAAAATCAGCAAAATTTATAGAA 29493  
|||||  
29601 GCTTTTTAGTGTCATGACGCTATTGCCCAAGCGTTATTTCTCTGATTGCCATCAAAGCTCATAGCCCTCATCGCAATAAAATCAGCAAAATTTATAGAA 29700  
|||||

29494 GTTACATCAAAAATAAAAGGAAGCGTGATAAAAGAGCAATGTTTGGCAAAAAGTAATTTTCCATAGAGAAAGTCGCCGCGTTGGCTAAAAACCTTTAG 29593  
|||||  
29701 GTTACATCAAAAATAAAAGGAAGCGTGATAAAAGAGCAATGTTTGGCAAAAAGTAATTTTCCATAGAGAAAGTCGCCGCGTTGGCTAAAAACCTTTAG 29800  
|||||  
29594 CGTTAAGACTAGAGACACATTCTTAACGCTTTGTTTCATTTTTTCAAAGCTATCAGCAAAACAACACTAAAGAATTACCATAACTGCCTAGCGTAATATC 29693  
|||||  
29801 CGTTAAGACTAGAGACACATTCTTAACGCTTTGTTTCATTTTTTCAAAGCTATCAGCAAAACAACACTAAAGAATTACCATAACTGCCTAGCGTAATATC 29900  
|||||  
29694 GCCATTACCCACTAATTCGCTCAAGCAACCTAAAGTCATGCCCTGCTCTTTAGAGCCTCCACTAATAATAATCTTCTAGAAAGTAAAGCTAGTTTGTCC 29793  
|||||  
29901 GCCATTACCCACTAATTCGCTCAAGCAACCTAAAGTCATGCCCTGCTCTTTAGAGCCTCCACTAATAATAATCTTCTAGAAAGTAAAGCTAGTTTGTCC 30000  
|||||  
29794 TTTAAAACCTGTGAGTTTTTAGGCGAATAAGCATGCATAAAGATAAAATTCGCTGTCTAGAGCGTTGATTTTTATCAAAACAAATCGCTCTGTGATTTAGGGG 29893  
|||||  
30001 TTTAAAACCTGTGAGTTTTTAGGCGAATAAGCATGCATAAAGATAAAATTCGCTGTCTAGAGCGTTGATTTTTATCAAAACAAATCGCTCTGTGATTTAGGGG 30100  
|||||  
29894 CGTATTCATAATCTCAATAGCGCTAAAAATTTTTTCACTCAAATCGTCATTTAAGATTTTTCCATGCTTATTGGCAAAATAAATCTTTTACCCACC 29993  
|||||  
30101 CGTATTCATAATCTCAATAGCGCTAAAAATTTTTTCACTCAAATCGTCATTTAAGATTTTTCCATGCTTATTGGCAAAATAAATCTTTTACCCACC 30200  
|||||  
29994 ATGCATTTTTTCTTGTAGATACAAGTCTTTTCTGTGCAAAATAAAGGGGCTTCATTCATCCCAAGGAAATTTATAAACTCGCATTTGTTGGAGTAA 30093  
|||||  
30201 ATGCATTTTTTCTTGTAGATACAAGTCTTTTCTGTGCAAAATAAAGGGGCTTCATTCATCCCAAGGAAATTTATAAACTCGCATTTGTTGGAGTAA 30300  
|||||  
30094 ATAACGCCATCTTTAGTGTATTTCTTTAATCTAATGGGGTGGTATTTACTCAATAGCTCTTCTATGAGCTCTATCCTATCCTTGAAGTTTTCAAGCTTGG 30193  
|||||  
30301 ATAACGCCATCTTTAGTGTATTTCTTTAATCTAATGGGGTGGTATTTACTCAATAGCTCTTCTATGAGCTCTATCCTATCCTTGAAGTTTTCAAGCTTGG 30400  
|||||  
30194 CTCTAATAATCCTTTGAAACTCTTCAAATATTTGTCTGCAAAATGCTTTTTATTATCAACGGGTCATTGAGAGTGTCTAATAAATCTGTCTATGGT 30293  
|||||  
30401 CTCTAATAATCCTTTGAAACTCTTCAAATATTTGTCTGCAAAATGCTTTTTATTATCAACGGGTCATTGAGAGTGTCTAATAAATCTGTCTATGGT 30500  
|||||  
30294 GAGATAAAAACATAATCATAAAAACCTTCTCTCTTTTGTCTCTCATTATAGGCTCGCATAAAATCATTAGAAAAATAAGACCATAGTCCCTATTGGTT 30393  
|||||  
30501 GAGATAAAAACATAATCATAAAAACCTTCTCTCTTTTGTCTCTCATTATAGGCTCGCATAAAATCATTAGAAAAATAAGACCATAGTCCCTATTGGTT 30600  
|||||  
30394 TCATCAATAACGATTTCTTTTTAATAGTGTGAAAATAAAATTTGAATTCAGGGGTAACAAAATTCCTAAAAACGCTATAAATAGAAAGCGTAACTCTA 30493  
|||||  
30601 TCATCAATAACGATTTCTTTTTAATAGTGTGAAAATAAAATTTGAATTCAGGGGTAACAAAATTCCTAAAAACGCTATAAATAGAAAGCGTAACTCTA 30700  
|||||  
30494 TGAGATCTTTTTTTGAAGTGGTTAAAAAATCAATGCCCCCAATTTGATTTGTGCCTAAAAGAGAATAGTTGTTAGTAAAGGATCACCCTCATCTAAAAA 30593  
|||||  
30701 TGAGATCTTTTTTTGAAGTGGTTAAAAAATCAATGCCCCCAATTTGATTTGTGCCTAAAAGAGAATAGTTGTTAGTAAAGGATCACCCTCATCTAAAAA 30800  
|||||  
30594 ACATTCATAGTTATTTCGCTAGATAGGAGTTTGCAGCGCTCACAAAGTCTGCTCTCTGTTGGATTAAAGTGGATGTCATTAGCCATTTCTTTACTAGGC 30693  
|||||  
30801 ACATTCATAGTTATTTCGCTAGATAGGAGTTTGCAGCGCTCACAAAGTCTGCTCTCTGTTGGATTAAAGTGGATGTCATTAGCCATTTCTTTACTAGGC 30900  
|||||  
30694 TTCATGAAAAAATGCTCATGAACGCTTTGTTTTTTCAGCCCTTAAACAAAAAAGGTTTTTTAAATTTTCATCGCTCGCTCCATTCTTTGATAAAGCCTGT 30793  
|||||  
30901 TTCATGAAAAAATGCTCATGAACGCTTTGTTTTTTCAGCCCTTAAACAAAAAAGGTTTTTTAAATTTTCATCGCTCGCTCCATTCTTTGATAAAGCCTGT 31000  
|||||  
30794 AATCTTTCTTGAATCCAAGAGCTACAAGCACAATAACAATCGCTACAATCAAACAGGTTTCATAGGCTTGAAAAAGAATAACAGATAATACAATTTGTAC 30893  
|||||  
31001 AATCTTTCTTGAATCCAAGAGCTACAAGCACAATAACAATCGCTACAATCAAACAGGTTTCATAGGCTTGAAAAAGAATAACAGATAATACAATTTGTAC 31100  
|||||  
30894 AAACAATATAAATATAGAGGAATAAATAAAAGTTTTCAGGGAACCAAAACAACCTATTCGCCCATCAAACAAGACTTTAAAAAAGGGATTGACACCCCTT 30993  
|||||  
31101 AAACAATATAAATATAGAGGAATAAATAAAAGTTTTCAGGGAACCAAAACAACCTATTCGCCCATCAAACAAGACTTTAAAAAAGGGATTGACACCCCTT 31200  
|||||  
30994 TGCATGCTGCTTTAAGTCTTCTATTTTTTGAATTTGGCGCTTTTGAACCTCTTGTCTATGACTAGCTTTTTTTGTTTCGTCAGCTTGTGTTGCTTGCCA 31093  
|||||  
31201 TGCATGCTGCTTTAAGTCTTCTATTTTTTGAATTTGGCGCTTTTGAACCTCTTGTCTATGACTAGCTTTTTTTGTTTCGTCAGCTTGTGTTGCTTGCCA 31300  
|||||  
31094 CAAACACCCCTCTCTTTATAGATATACCGCTTCACATGTAATTGTATAAAAGATTTTTTTGAGAGACTCTACGGTGCTAATATGTTTCAAAGATCGTTA 31193  
|||||  
31301 CAAACACCCCTCTCTTTATAGATATACCGCTTCACATGTAATTGTATAAAAGATTTTTTTGAGAGACTCTACGGTGCTAATATGTTTCAAAGATCGTTA 31400  
|||||  
31194 GGATCATAAAGATTGAATACGGCCAAATAAACATTATACAGCTTATCATCGCATAAAATTTCTCTTGTCTTCCGCGCAATGACAGAAAGCAGCGTTGTT 31293  
|||||  
31401 GGATCATAAAGATTGAATACGGCCAAATAAACATTATACAGCTTATCATCGCATAAAATTTCTCTTGTCTTCCGCGCAATGACAGAAAGCAGCGTTGTT 31500  
|||||  
31294 TGTGGTCTGCTGATGCTTTTGAAGTAAAAAGTCTTTCACTTCAGGATTGATCTGTAATTTACATTCAATCCATTTCTTTACCTTTTTCATCAA 31393  
|||||  
31501 TGTGGTCTGCTGATGCTTTTGAAGTAAAAAGTCTTTCACTTCAGGATTGATCTGTAATTTACATTCAATCCATTTCTTTACCTTTTTCATCAA 31600  
|||||  
31394 GATTTTTTCAATGATTGGATCGTAATGCTTCAAATCCTTTATTTTTTTAAGGACTCTATTGACAATCAGGAAGTCAAACCTCATCTTTGATAATATCG 31493  
|||||  
31601 GATTTTTTCAATGATTGGATCGTAATGCTTCAAATCCTTTATTTTTTTAAGGACTCTATTGACAATCAGGAAGTCAAACCTCATCTTTGATAATATCG 31700  
|||||

31494 GGATTGACTTCTTTGAAAGTTACTTCTTGTCTTTCAAATTTTGATAGTCGCTTTAAAACATCAAATCTAAATTCGTATAAACAAGCCATTGGGAG 31593  
|||||  
31701 GGATTGACTTCTTTGAAAGTTACTTCTTGTCTTTCAAATTTTGATAGTCGCTTTAAAACATCAAATCTAAATTCGTATAAACAAGCCATTGGGAG 31800  
|||||  
31594 TGTTTTTCTTTTTCTAGTGCTTCTTTTTGGCTTCTTTATCGTCATTTGCTGACCCATACGAACTGAAAACAACGAGACTTAAGAGAACTTTCAAAA 31693  
|||||  
31801 TGTTTTTCTTTTTCTAGTGCTTCTTTTTGGCTTCTTTATCGTCATTTGCTGACCCATACGAACTGAAAACAACGAGACTTAAGAGAACTTTCAAAA 31900  
|||||  
31694 AAAGCCTCTTAGTTTTTATTGCTATTATTATTGTTGATCAATTTAGCTAGCTCCTCCACTCTCGCCAATATTGAAGCCAAACTTAGTGCTCAAAAAGAT 31793  
|||||  
31901 AAAGCCTCTTAGTTTTTATTGCTATTATTATTGTTGATCAATTTAGCTAGCTCCTCCACTCTCGCCAATATTGAAGCCAAACTTAGTGCTCAAAAAGAT 32000  
|||||  
31794 AATACCGCCTGCCACCGCTAACATAGCTATGGGTTGCGCGTAAGCAAAAACAGTTGCTTGACCTCTTTTGATGTCATCAGAGATTTTCCAAATATCCGCT 31893  
|||||  
32001 AATACCGCCTGCCACCGCTAACATAGCTATGGGTTGCGCGTAAGCAAAAACAGTTGCTTGACCTCTTTTGATGTCATCAGAGATTTTCCAAATATCCGCT 32100  
|||||  
31894 ATGCCTTTGACCCCTAAAGCACAACCACCTACGATCGCTAGAACAGAAATGATCTGAATAACCAAACCTTTAGTTTCAGTAACGCCTGCTGCAGGACTGG 31993  
|||||  
32101 ATGCCTTTGACCCCTAAAGCACAACCACCTACGATCGCTAGAACAGAAATGATCTGAATAACCAAACCTTTAGTTTCAGTAACGCCTGCTGCAGGACTGG 32200  
|||||  
31994 TGACCGCCATTAAAGGATTGGTTGTCATCACTAGCCCTAAAGTT 32037  
|||||  
32201 TGACCGCCATTAAAGGATTGGTTGTCATCACTAGCCCTAAAGTT 32244  
|||||

Supplementary Figure S8

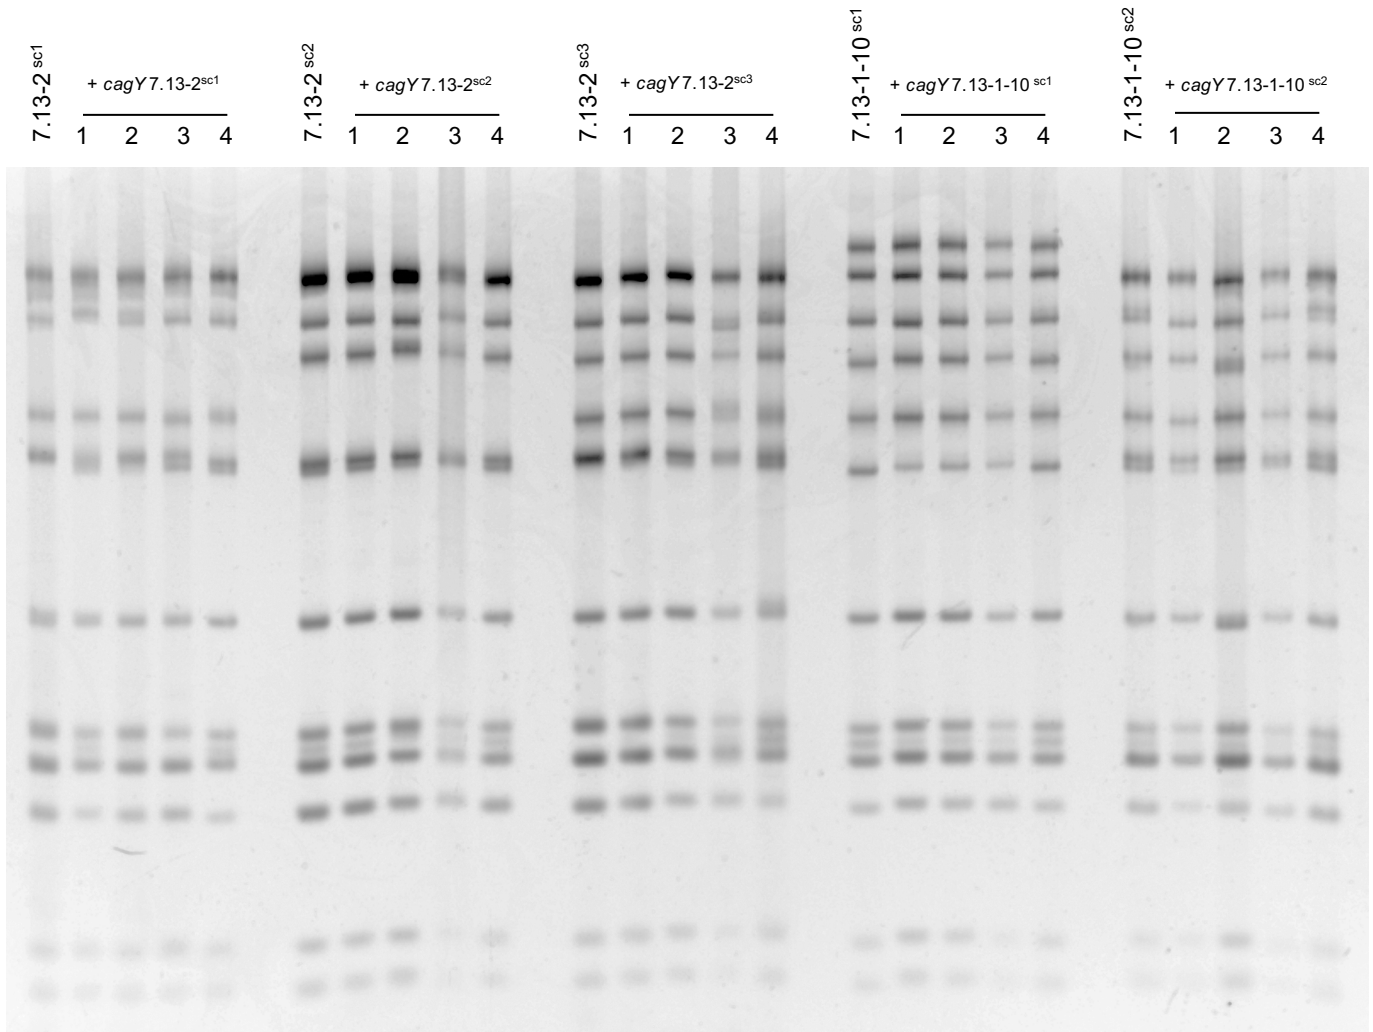

Lanes:

1. *Hp* 7.13-1<sup>sc2</sup>  $\Delta$ *cagY*
2. *Hp* 7.13-2<sup>sc1</sup>  $\Delta$ *cagY*
3. *Hp* 7.13-2<sup>sc2</sup>  $\Delta$ *cagY*
4. *Hp* 7.13-2<sup>sc3</sup>  $\Delta$ *cagY*

*cagY* RFLP of *H. pylori* recipient strains 7.13-1<sup>sc2</sup>, 7.13-2<sup>sc1</sup>, 7.13-2<sup>sc2</sup>, and 7.13-2<sup>sc3</sup> complemented with *cagY* from donor strains 7.13-2<sup>sc1</sup>, 7.13-2<sup>sc2</sup>, 7.13-2<sup>sc3</sup>, 7.13-1-10<sup>sc1</sup>, and 7.13-1-10<sup>sc2</sup>



Supplementary Figure S9

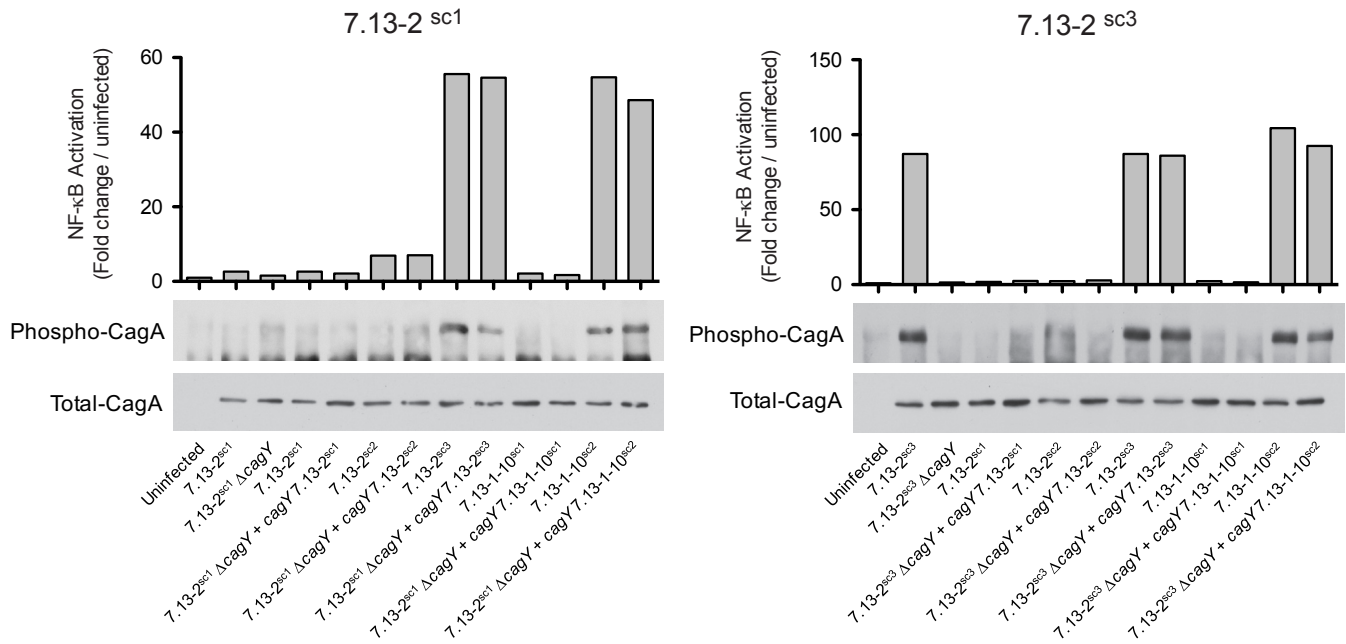

NF-κB activation and CagA translocation using *H. pylori* wild type strains 7.13-2<sup>sc1</sup> and 7.13-2<sup>sc3</sup> complemented with *cagY* from strains 7.13-2<sup>sc1</sup>, 7.13-2<sup>sc2</sup>, 7.13-2<sup>sc3</sup>, 7.13-1-10<sup>sc1</sup>, and 7.13-1-10<sup>sc2</sup>

Supplementary Figure S10

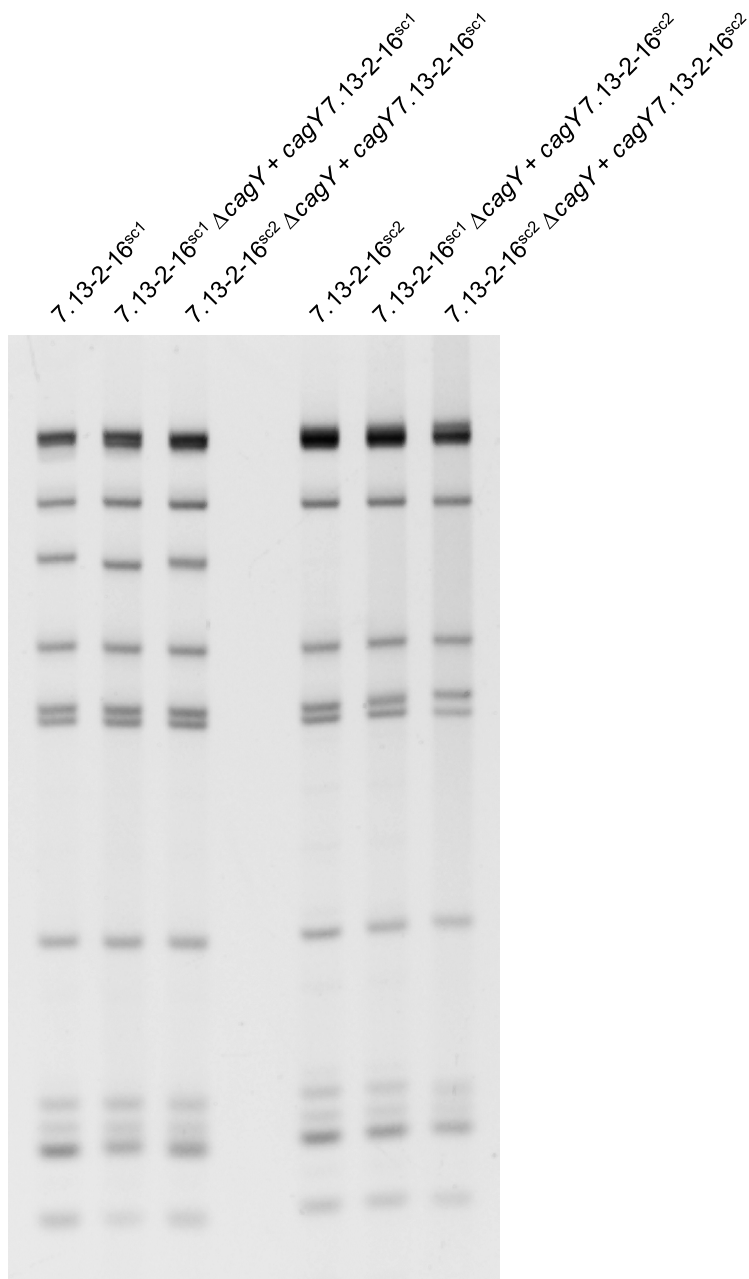

*cagY* RFLP of *H. pylori* recipient strains 7.13-2-16<sup>sc1</sup>, and 7.13-2-16<sup>sc2</sup> complemented with either endogenous *cagY* or with *cagY* from the sibling *H. pylori* strain
