# Supplementary material
Source: PubMed Central journal article supplement (PMC5413443)
Supplement: NIHMS853119-supplement-3.pdf [file NIHMS853119-supplement-3.pdf]

Supplementary Table 1: Names and sequences of primers used in this study

|                         | Name                 | Sequence                              |                                |
|-------------------------|----------------------|---------------------------------------|--------------------------------|
| PCR primers             | <i>cagY</i> F        | 5'-AACATCACTCTCCAACCTGC-3'            |                                |
|                         | <i>cagY</i> R        | 5'-ATTGTAAGTGGCTAACACAAGG-3'          |                                |
|                         | <i>cag</i> PAI I F   | 5'-TGAAAGGAAACAGCAATGGAACTCGG-3'      |                                |
|                         | <i>cag</i> PAI I R   | 5'-ATACCTTATGGAGGTAACACTATGGC-3'      |                                |
|                         | <i>cag</i> PAI II F  | 5'-TTGAGCTAATAATTTGGATCGC-3'          |                                |
|                         | <i>cag</i> PAI II R  | 5'-TAACGCCTTTTTATTTATCTCTGAC-3'       |                                |
|                         | <i>cag</i> PAI III F | 5'-TTCAATTTGAAAGGAAACGCATG-3'         |                                |
|                         | <i>cag</i> PAI III R | 5'-TAGAAATCATAGCTTGTCTCTCAG-3'        |                                |
|                         | <i>cagA</i> F        | 5'-ATTTTTAGCAGTCTTTGACACC-3'          |                                |
|                         | <i>cagA</i> R        | 5'-ATATGATACCATGAATTGGTAGC-3'         |                                |
|                         | Sequencing Primers   | <i>cag</i> PAI I S1 F                 | 5'-AGCGAATGGTGAAAGGGTGCAG-3'   |
|                         |                      | <i>cag</i> PAI I S2 F                 | 5'-AACCTTTGGCTTTTGGTTGCAAGC-3' |
| <i>cag</i> PAI I S3 F   |                      | 5'-ATCTCATGTGGACTAAAAAGGGGCTTGAG-3'   |                                |
| <i>cag</i> PAI I S4 F   |                      | 5'-CAAGACGTGAGCCGAAGCATTGATG-3'       |                                |
| <i>cag</i> PAI I S5 F   |                      | 5'-AGCATGCTTTATTTCGTTATATCGCACTTG-3'  |                                |
| <i>cag</i> PAI I S6 F   |                      | 5'-TCCTCAAGTCATTAGGGTTGAGAGGTG-3'     |                                |
| <i>cag</i> PAI I S7 F   |                      | 5'-TCCAACAGATCCATAGCGTAGAGATAGG-3'    |                                |
| <i>cag</i> PAI I S8 F   |                      | 5'-TTTCTAGCGTTTCTGAAACGACCCC-3'       |                                |
| <i>cag</i> PAI II S1 F  |                      | 5'-ACTCGGCAATAATGCTGTATTGATAGCG-3'    |                                |
| <i>cag</i> PAI II S2 F  |                      | 5'-TTATCTTTTAAGGCTTGCTCCAAATCCCC-3'   |                                |
| <i>cag</i> PAI II S3 F  |                      | 5'-AGCCTTTATTATAGGCTGTTCAATATCAGC-3'  |                                |
| <i>cag</i> PAI II S4 F  |                      | 5'-TTTTAGCTTCTTTGTTGGGTGGCG-3'        |                                |
| <i>cag</i> PAI II S5 F  |                      | 5'-AGATGCATACAAACAAGGGAGCGT-3'        |                                |
| <i>cag</i> PAI II S6 F  |                      | 5'-TCTAGCTGAGCTTTTTCTCTTGCCAC-3'      |                                |
| <i>cag</i> PAI II S7 F  |                      | 5'-AGATTGCAAACAAAACAATATCCCACCC-3'    |                                |
| <i>cag</i> PAI II S8 F  |                      | 5'-ATTCTTTGAGGGATCGCAAGGATCAAC-3'     |                                |
| <i>cag</i> PAI II S9 F  |                      | 5'-AACATAGATGTATCCATGGATAGCGTGC-3'    |                                |
| <i>cag</i> PAI II S10 F |                      | 5'-TTGGCATTCAATTTGACCATAACGCC-3'      |                                |
| <i>cag</i> PAI II S11 F |                      | 5'-AACTCAACAAGAAACAAGCTGAAGAGGC-3'    |                                |
| <i>cag</i> PAI III S1 F |                      | 5'-TGAAACATATTAGCACCGTAGAGTCTCTC-3'   |                                |
| <i>cag</i> PAI III S2 F |                      | 5'-ATGAACCCGTTATGAATAAAAAGCATTTTGC-3' |                                |
| <i>cag</i> PAI III S3 F |                      | 5'-AACGCTATGGGGCAATTTGTTTAC-3'        |                                |
| <i>cag</i> PAI III S4 F |                      | 5'-AGATGGAAGCCCTAGCGTTATCGC-3'        |                                |
| <i>cag</i> PAI III S5 F |                      | 5'-TCAAAAACAAAACAGCGATTGAGTGGTG-3'    |                                |
| <i>cag</i> PAI III S6 F |                      | 5'-ACACCACCCCTAAAAATCCCAGC-3'         |                                |
| <i>cag</i> PAI III S7 F |                      | 5'-AGAAAAAGCCATTCAAGCGCAAATAGAG-3'    |                                |
| <i>cag</i> PAI III S8 F |                      | 5'-ATTTGAACGCGCTCATAGAAGTTGC-3'       |                                |
| <i>cagA</i> S1 F        |                      | 5'-TGGAAATGTTAGATGTTGAGGGAGTCGC-3'    |                                |
| <i>cagA</i> S2 F        |                      | 5'-TCTTCAAGGTAGCCTAAAACATGATGGC-3'    |                                |
| <i>cagA</i> S3 F        |                      | 5'-AGCAACAGGCGATTTTCAGTGGG-3'         |                                |
| <i>cagA</i> S4 F        |                      | 5'-TTATGCTATTAACAGCCACACACGCA-3'      |                                |
